# Supplementary material for: Total Synthesis and Bioactivity Investigation of a Chiral Diacylglycerol
Source: Research Square preprint supplement (doi:10.21203/rs.3.rs-6896088/v1), 2025-06-30

**Supporting Information for**

**Original article**

### **Total Synthesis and Bioactivity Investigation of a Chiral Diacylglycerol**

Xuemei Liao1.2.4, Xin Cheng2, Ruirong Zhuang3, Beidou Zhou1.2.4*

1. School of pharmacy and medical technology, Putian university, Putian 351100, China

2. School of Pharmacy, Fujian Medical University, Fuzhou 350108, China

3. Putian Lanhai Nuclear Medical Research Center, Putian 351100, China

4. Key laboratory of pharmaceutical analysis and laboratory medicine (Putian university), Fujian province university, Putian 351100, China

***Corresponding author*.* Tel: +8613205940072 E-mail: [491986737@qq.com](mailto:491986737@qq.com) or [beidouzhou@ptu.edu.cn](mailto:beidouzhou@ptu.edu.cn)

**Content**

The nuclear magnetic resonance spectrum and infrared spectrum data of each step product...........2

The high resolution mass spectrum of compound **1**.........................................................................13

1. The 1H NMR spectrum of (*S*)-4-((benzyloxy)methyl)-2,2-dimethyl-1,3-dioxolane (acetone-d6, 500 MHz) (**3**)


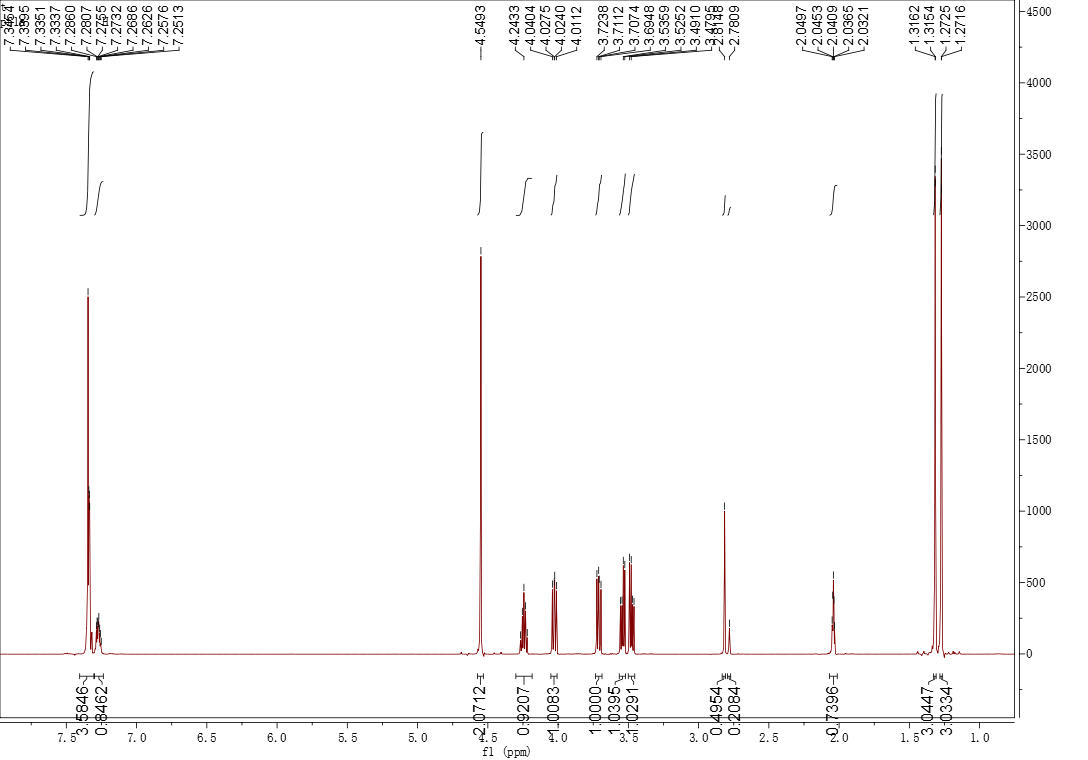


The 13C NMR spectrum of (*S*)-4-((benzyloxy)methyl)-2,2-dimethyl-1,3-dioxolane (**3**) (acetone-d6, 125 MHz) (**3**)


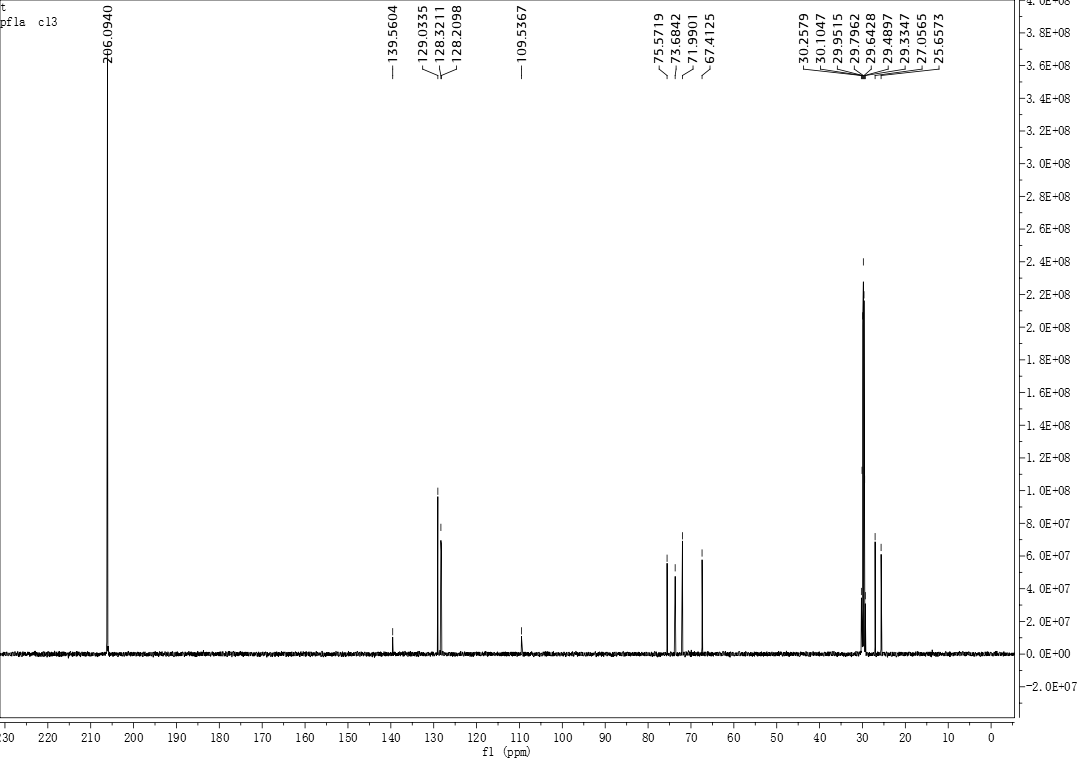


The IR spectrum of (*S*)-4-((benzyloxy)methyl)-2,2-dimethyl-1,3-dioxolane (KBr) (**3**)

###
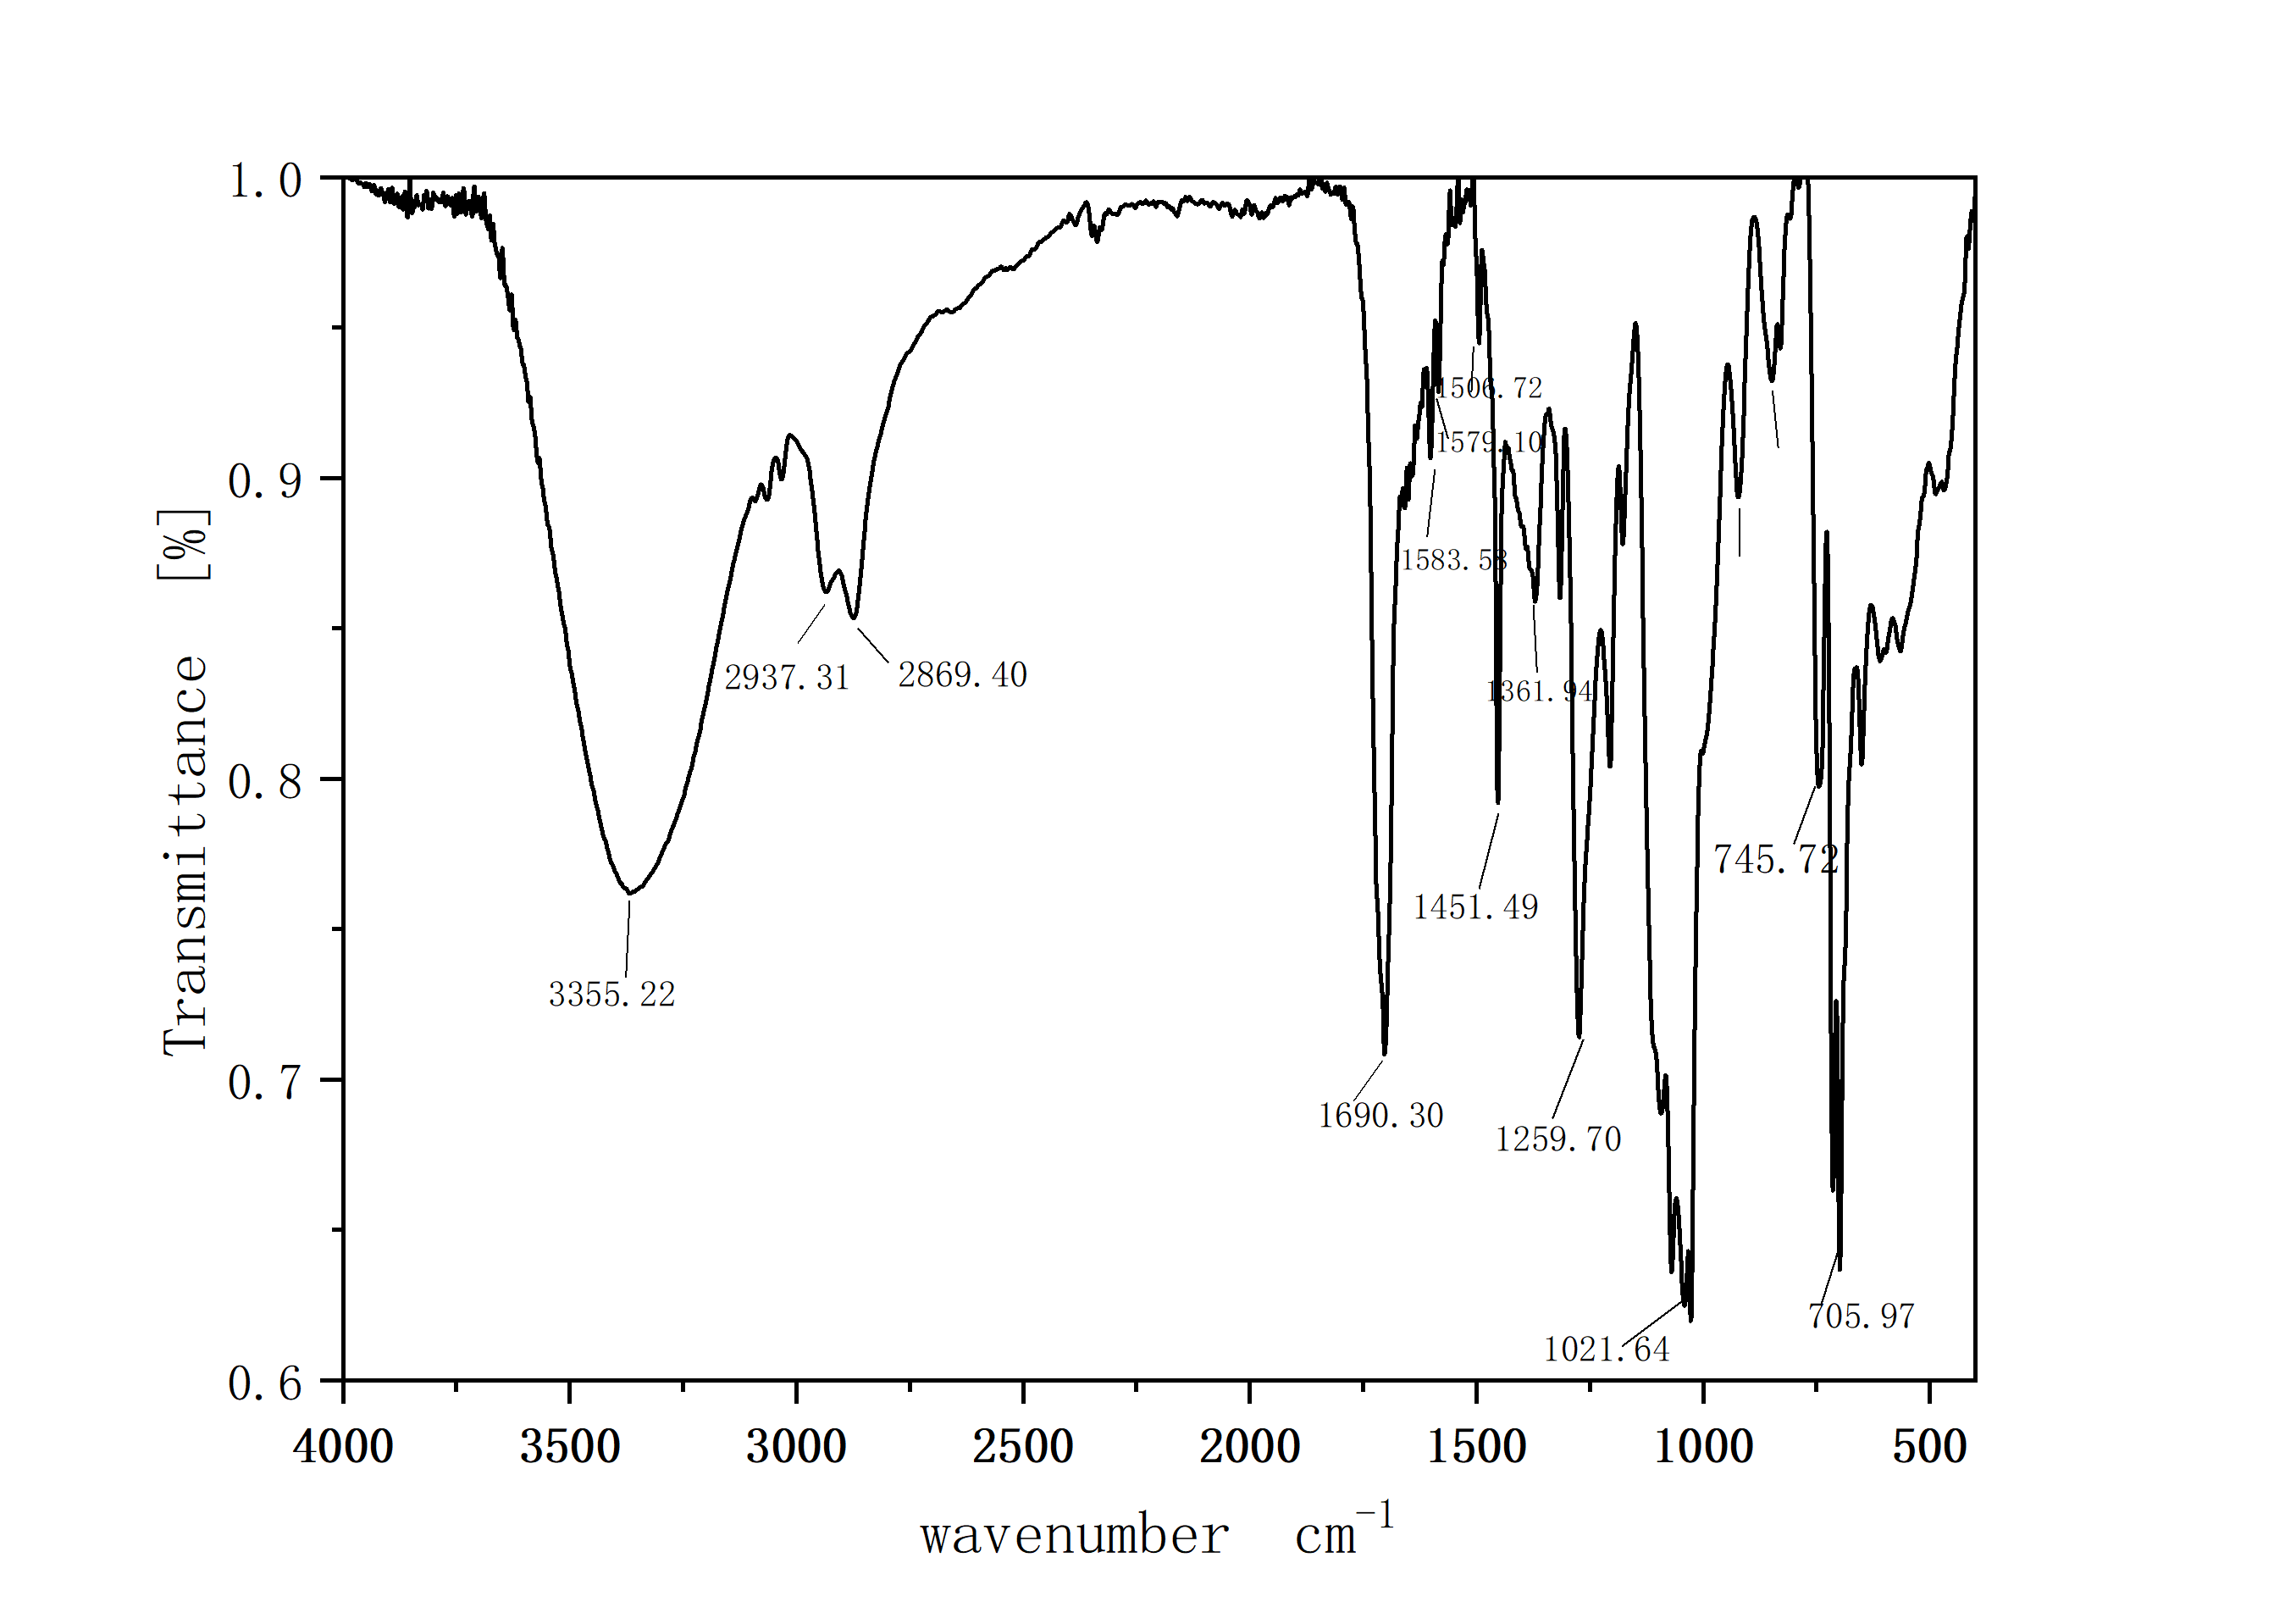


2.The 1H NMR spectrum of (*R*)-3-(benzyloxy)propane-1,2-diol (acetone-d6, 500 MHz) (**4**)


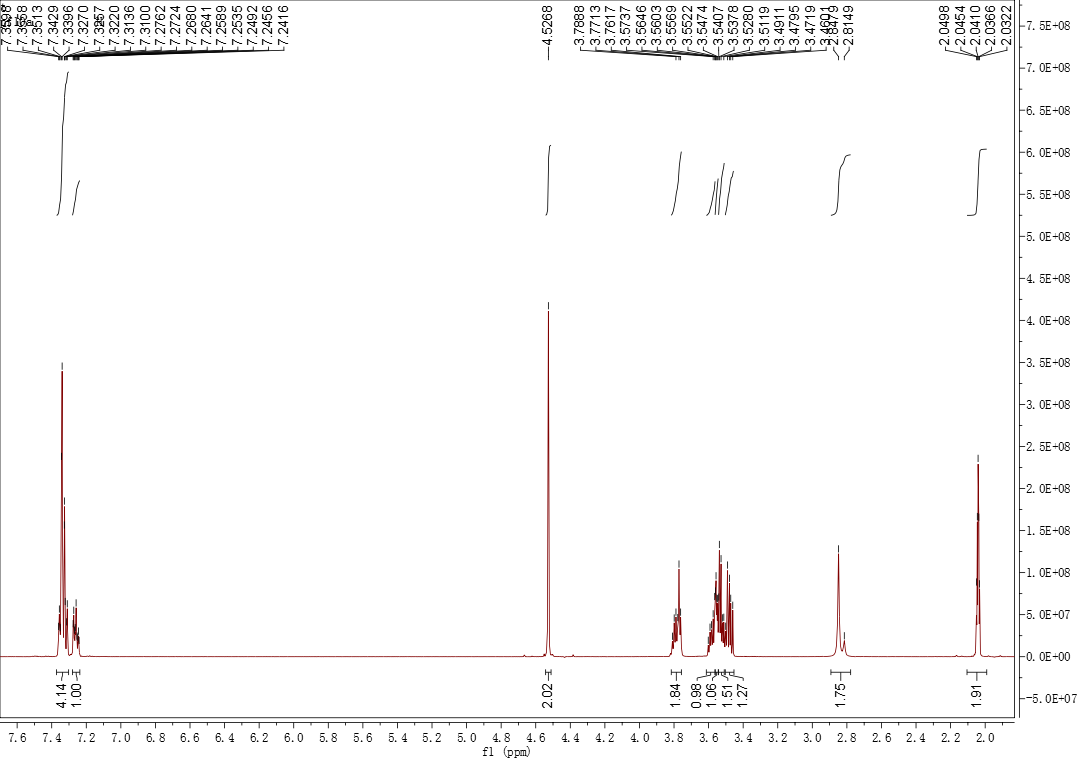


### The 13C NMR spectrum of (*R*)-3-(benzyloxy)propane-1,2-diol (acetone-d6, 125 MHz) (**4**)


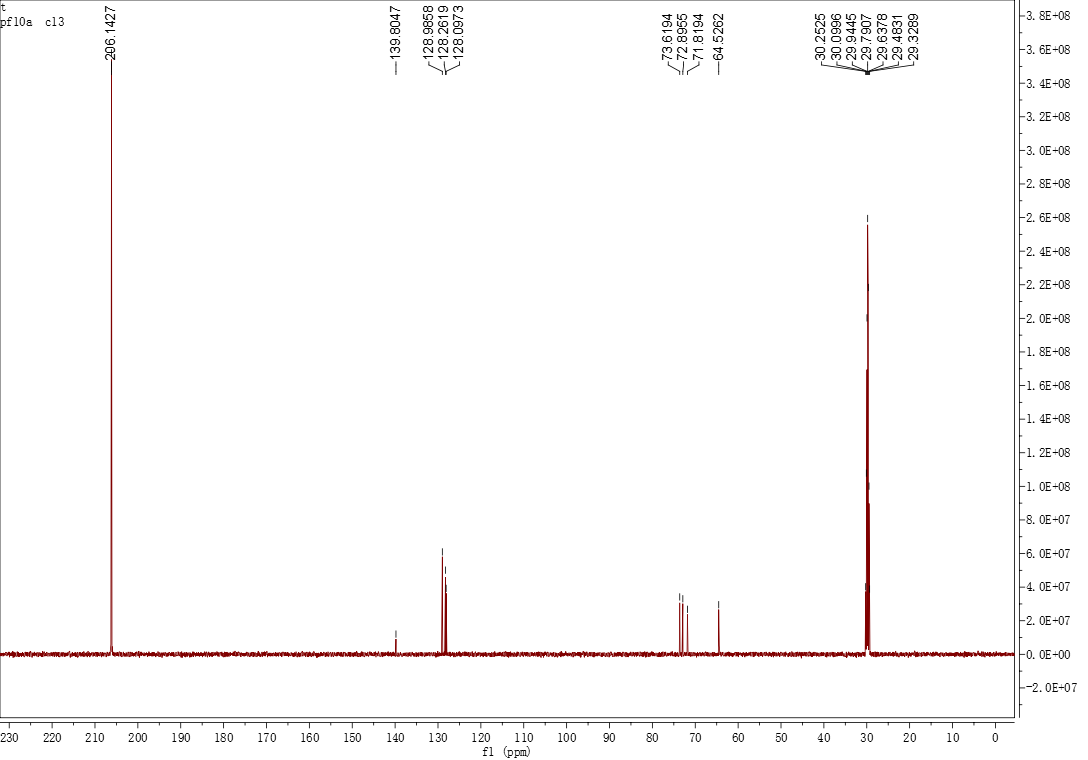


### The IR spectrum of (*R*)-3-(benzyloxy)propane-1,2-diol (KBr) (**4**)

###
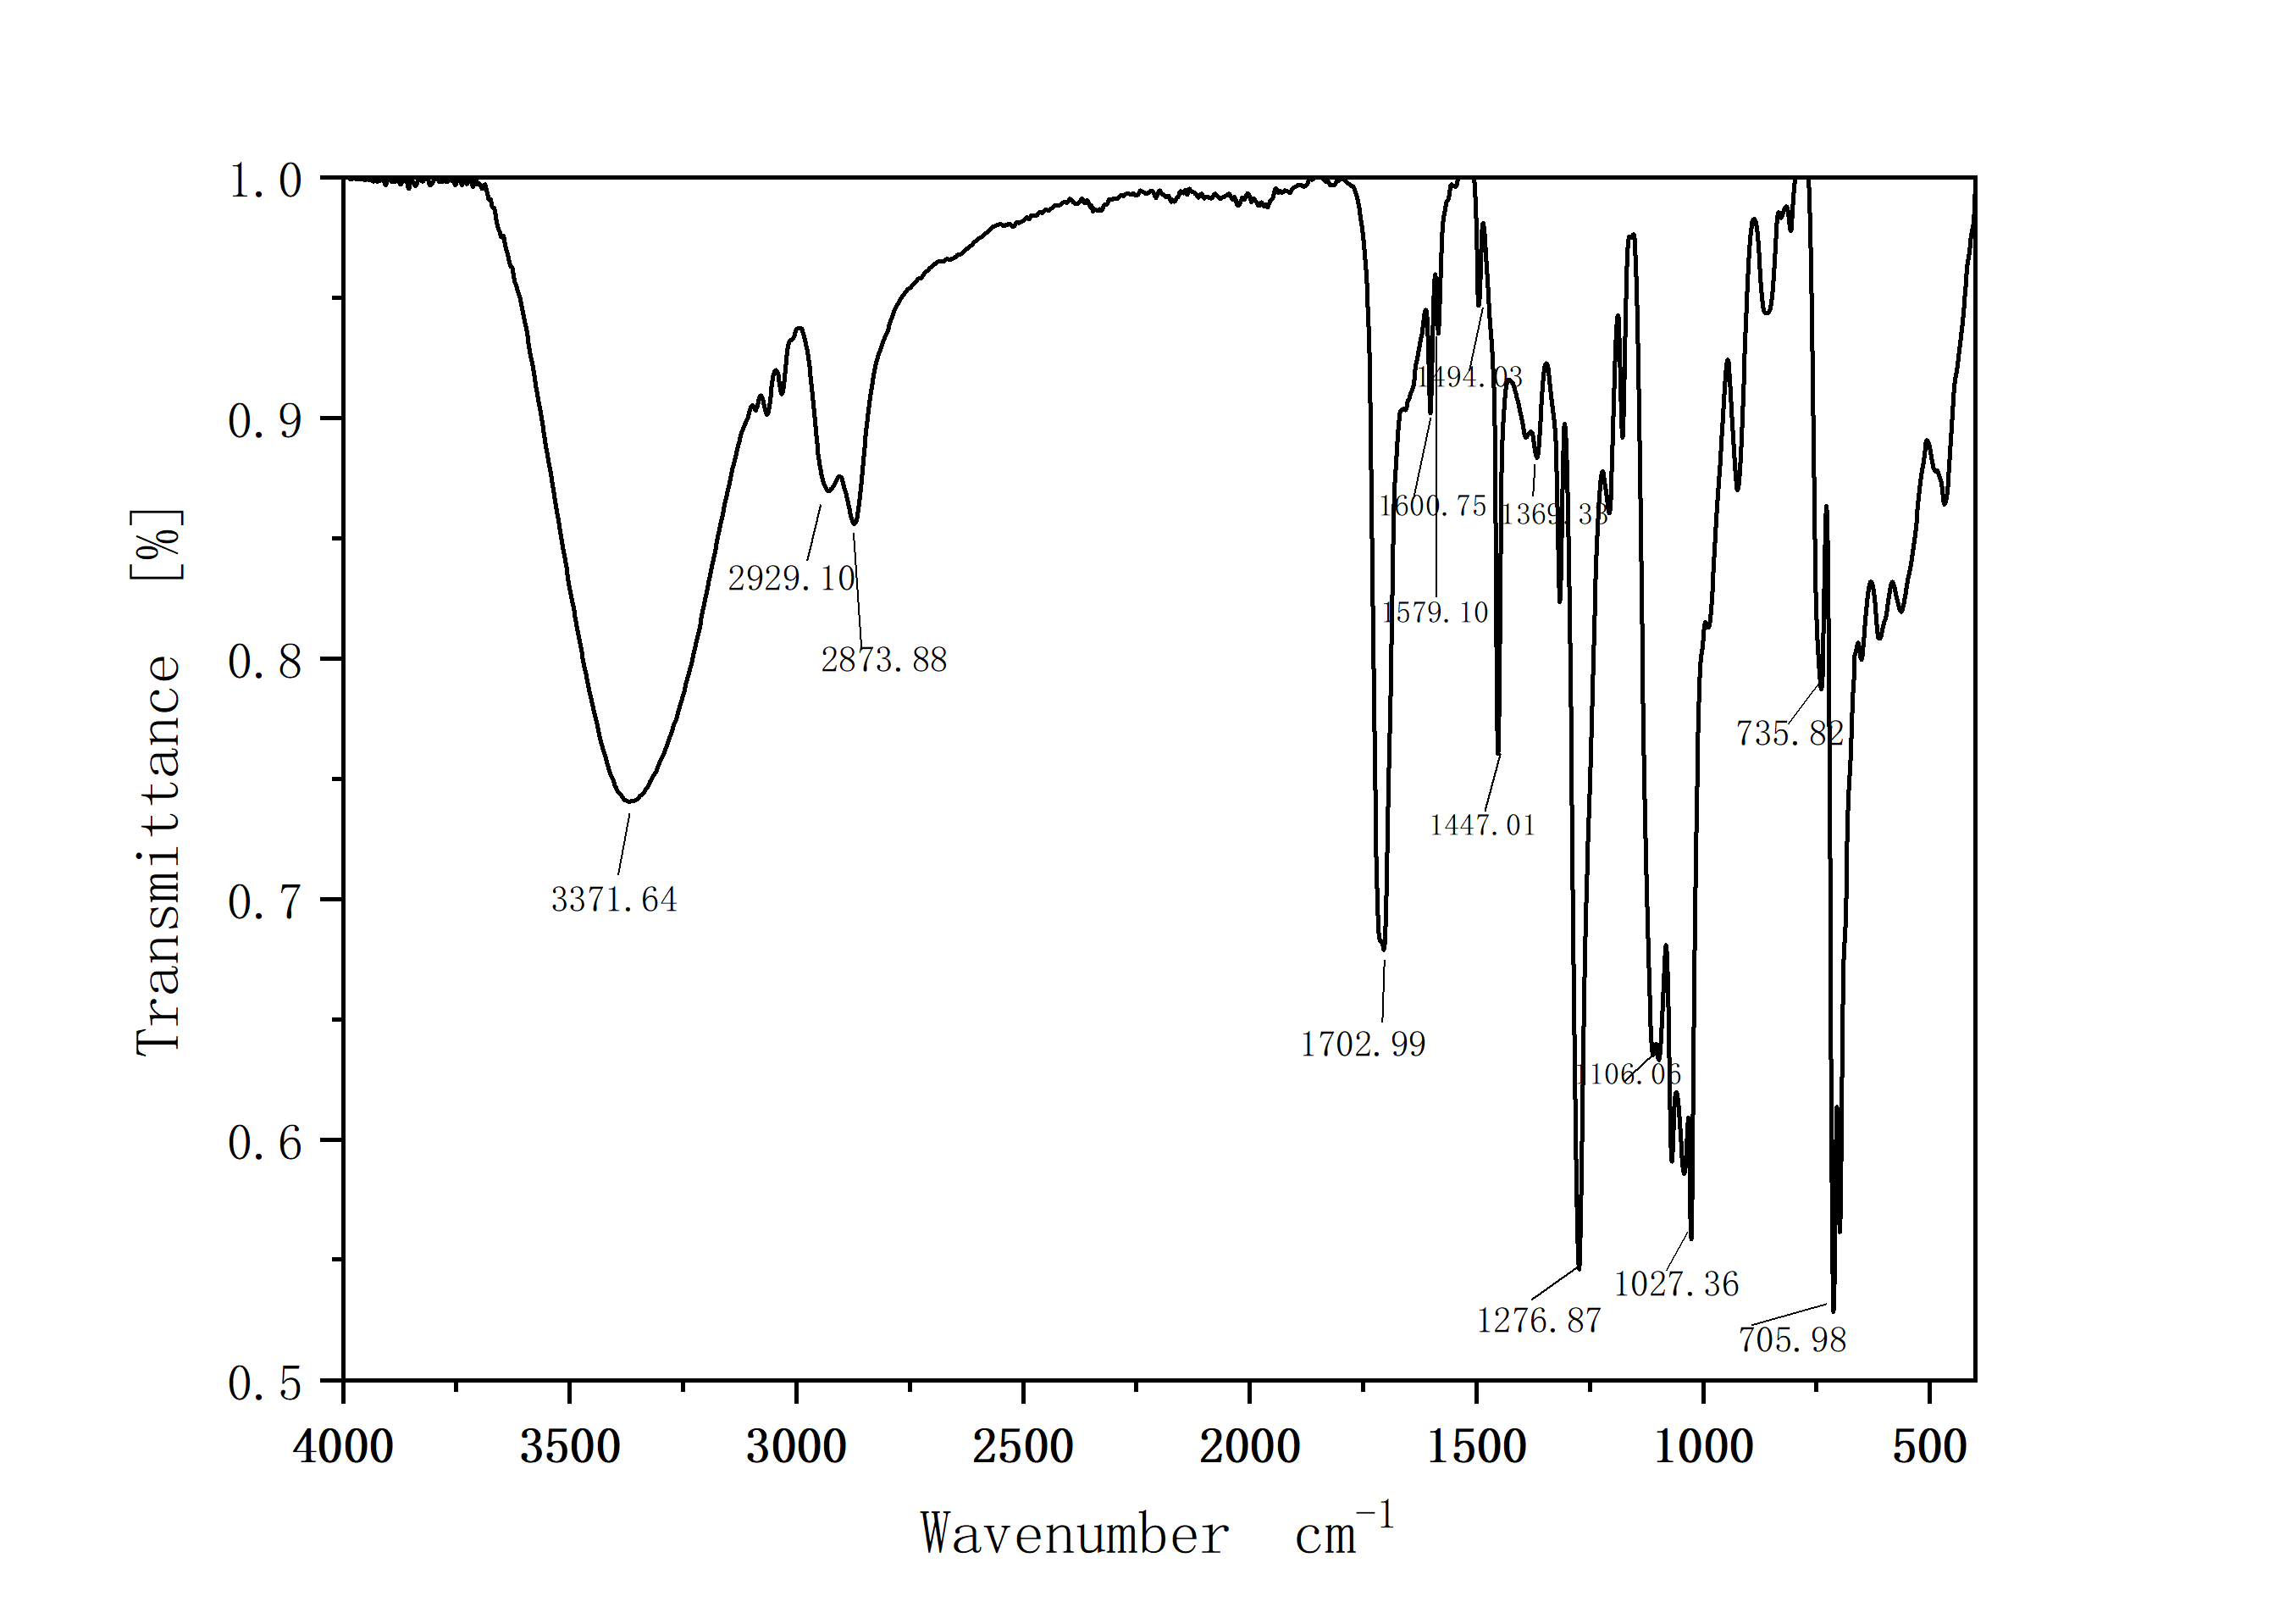


### 3. The 1H NMR spectrum of (*S*)-1-(benzyloxy)-3-((tert-butyldimethylsilyl)oxy)propan-2-ol (acetone-d6, 500MHz) (**5**)


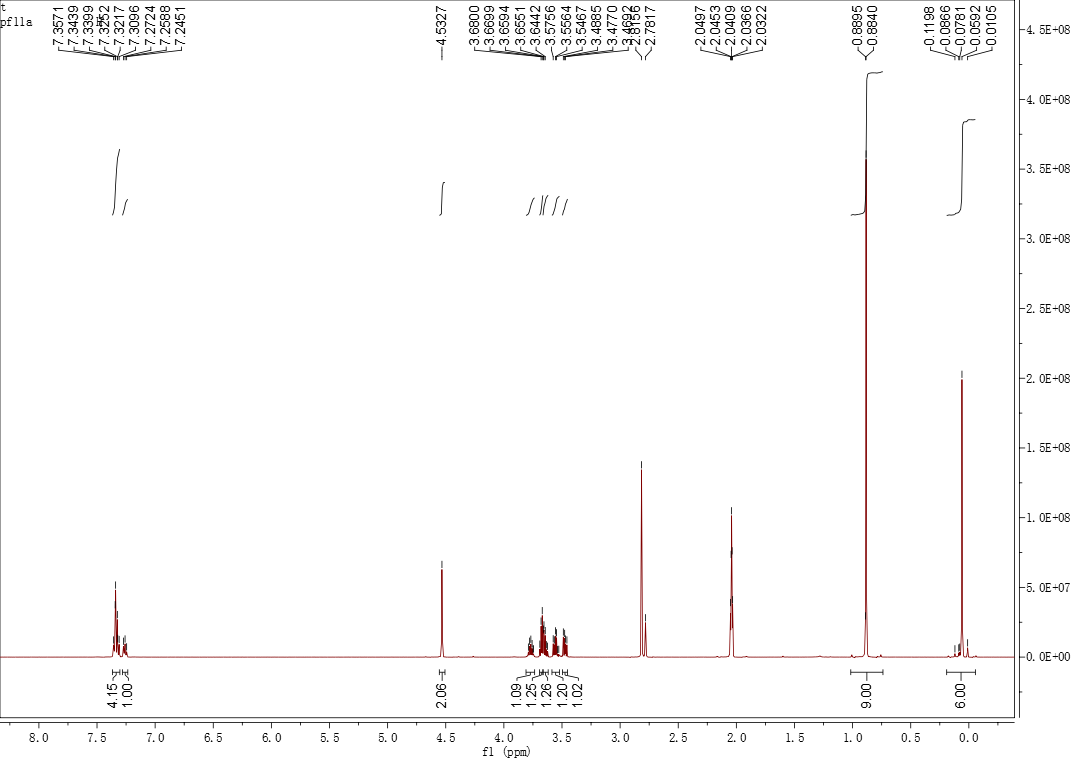


The 13C NMR spectrum of (*S*)-1-(benzyloxy)-3-((tert-butyldimethylsilyl)oxy)propan-2-ol (acetone-d6, 125 MHz) (**5**)


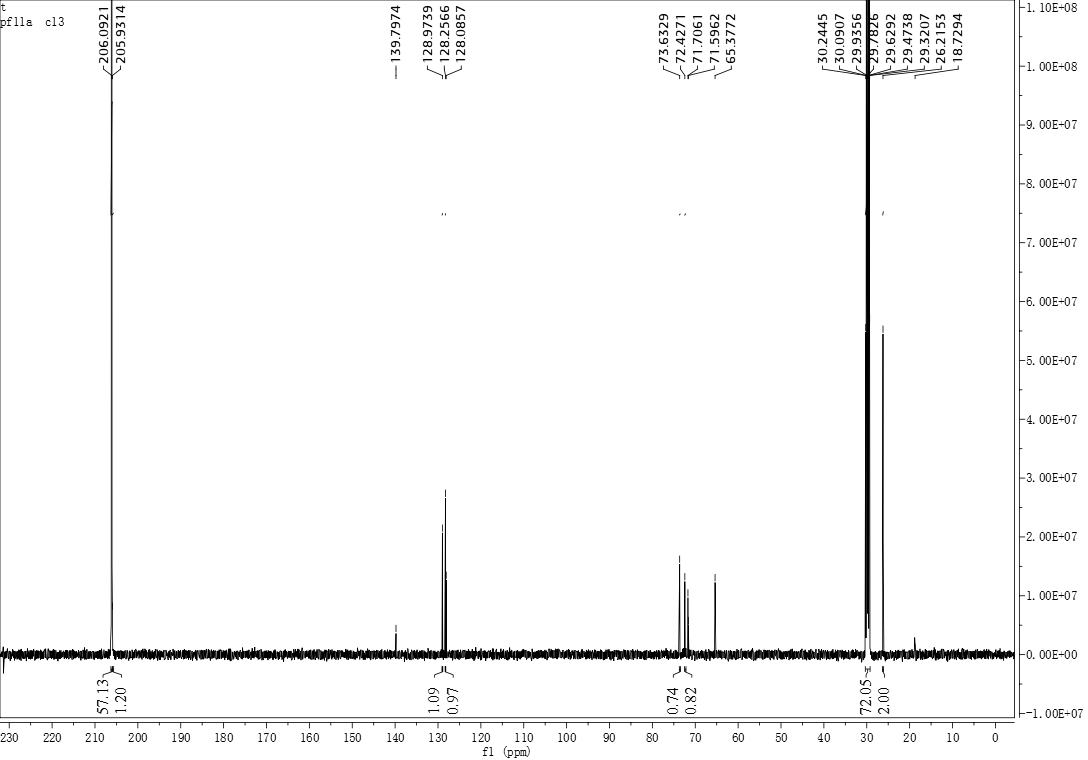


The IR spectrum of (*S*)-1-(benzyloxy)-3-((tert-butyldimethylsilyl)oxy)propan-2-ol (KBr) (**5**)

###
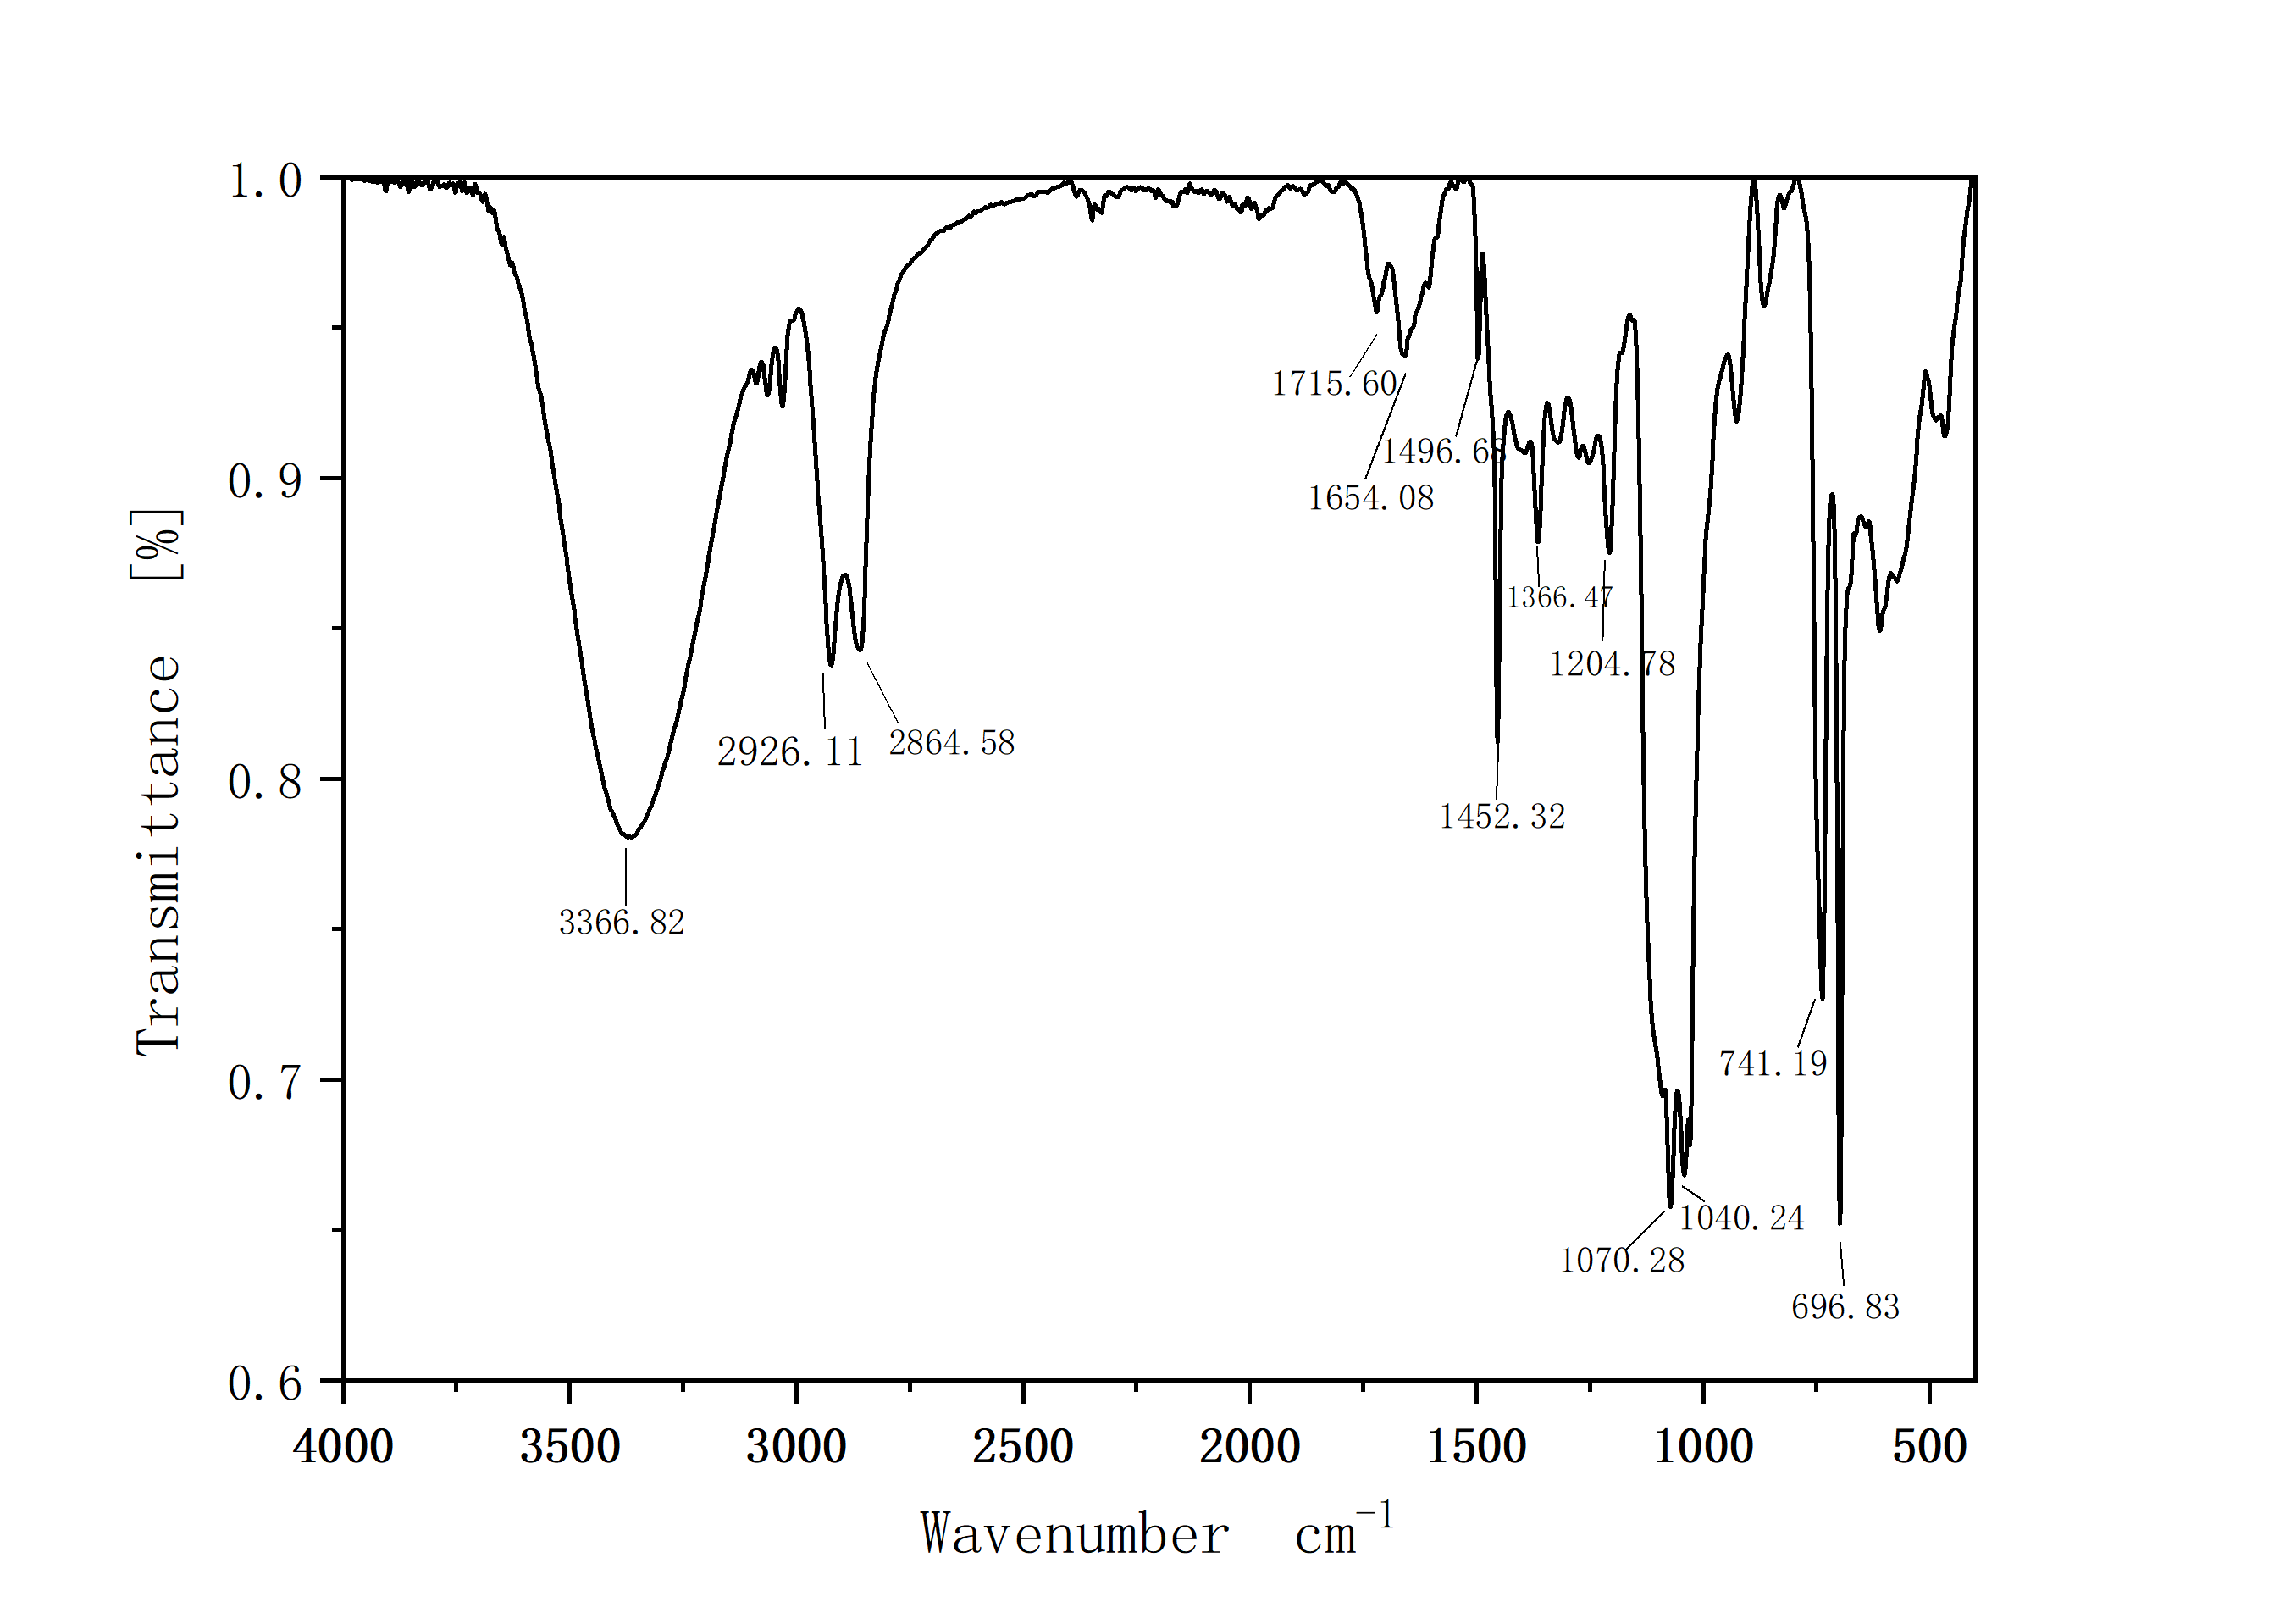


4. The 1H NMR spectrum of (*S*)-1-(benzyloxy)-3-((tert-butyldimethylsilyl)oxy)propan-2-yl(*Z*)- docos-13-enoate (acetone-d6, 500MHz) (**6**)


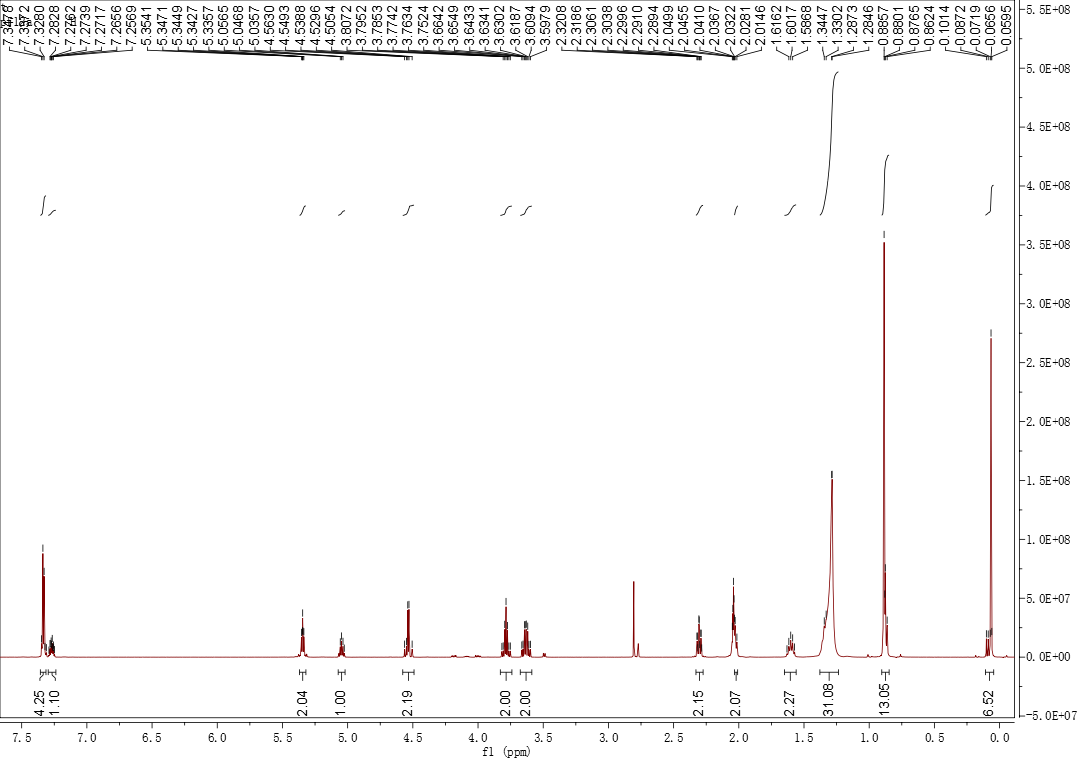


The 13C NMR spectrum of (*S*)-1-(benzyloxy)-3-((tert-butyldimethylsilyl)oxy)propan-2-yl(*Z*)- docos-13-enoate (acetone-d6, 125 MHz) (**6**)


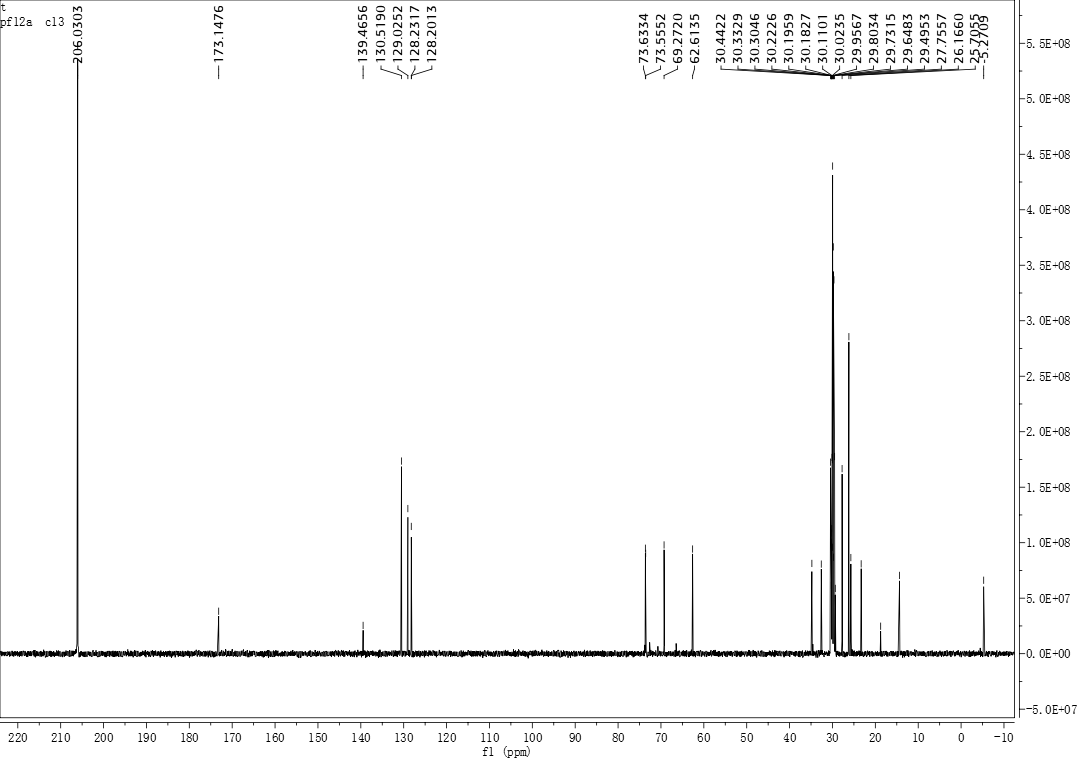


The IR spectrum of (*S*)-1-(benzyloxy)-3-((tert-butyldimethylsilyl)oxy)propan-2-yl (*Z*)-docos-13- enoate (KBr) (**6**)

###
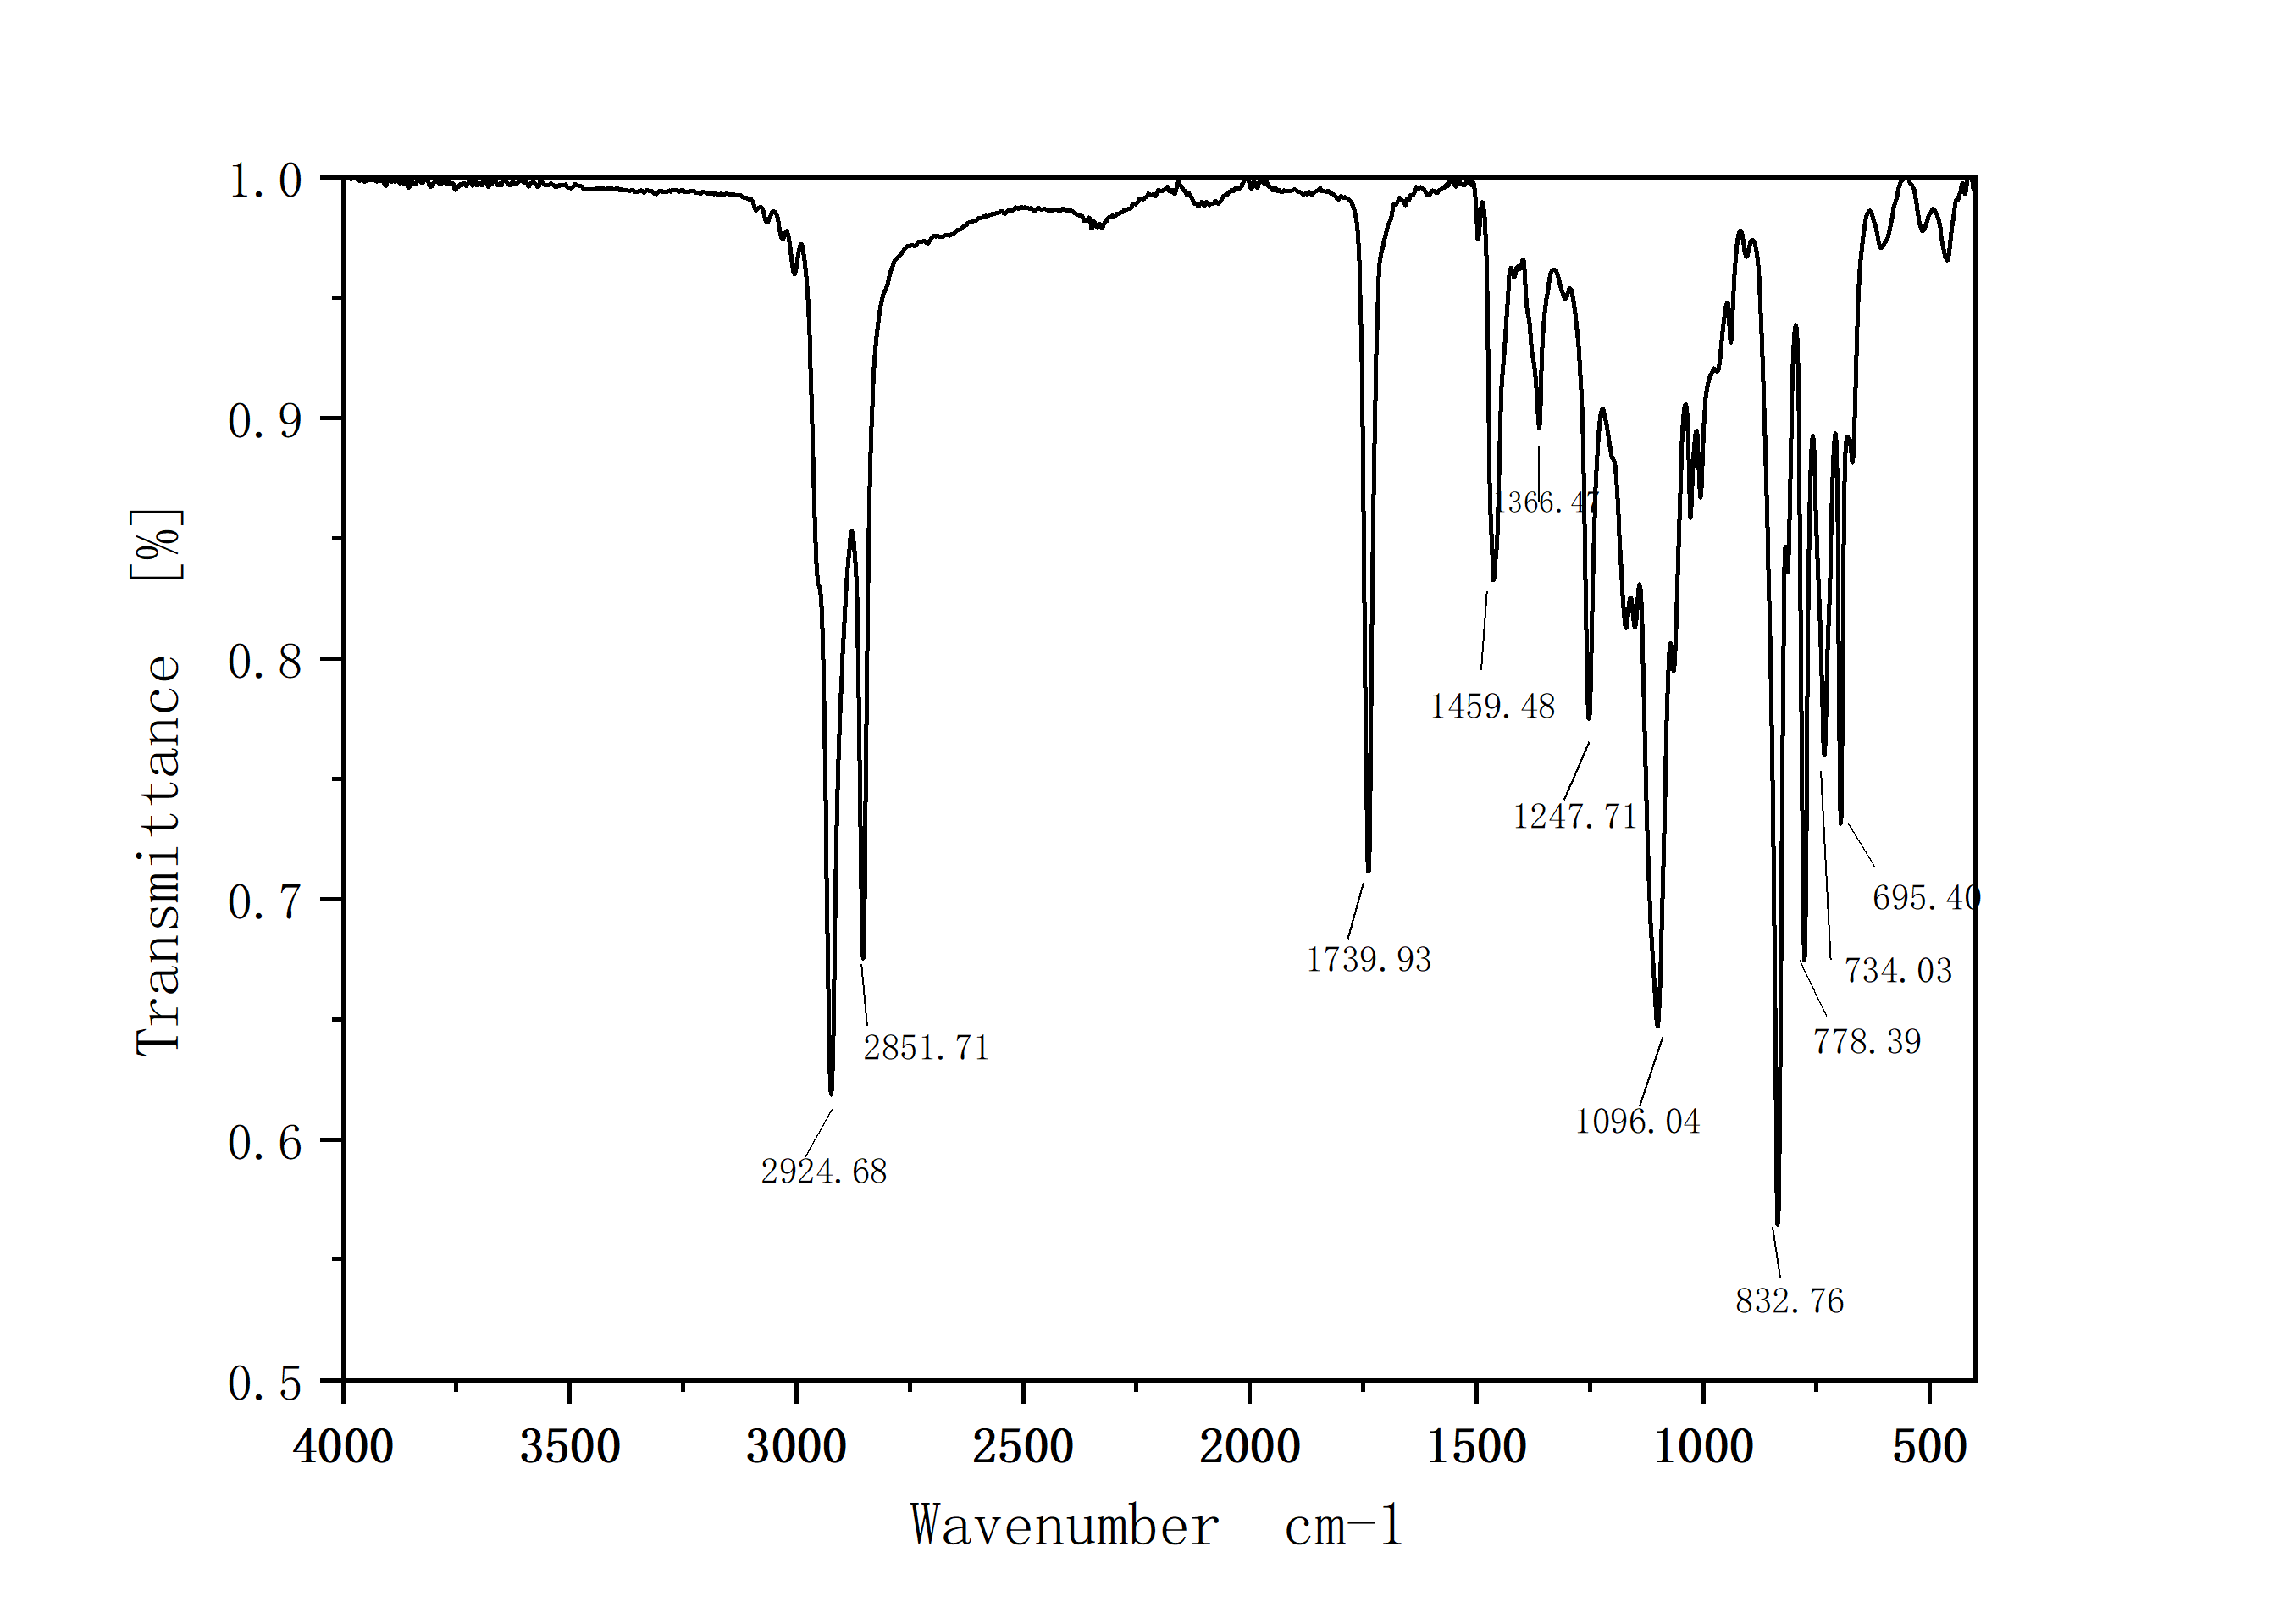


5. The 1H NMR spectrum of (*R*)-1-(benzyloxy)-3-hydroxypropan-2-yl (*Z*)-docos-13-enoate (acetone-d6, 500 MHz) (**7**)


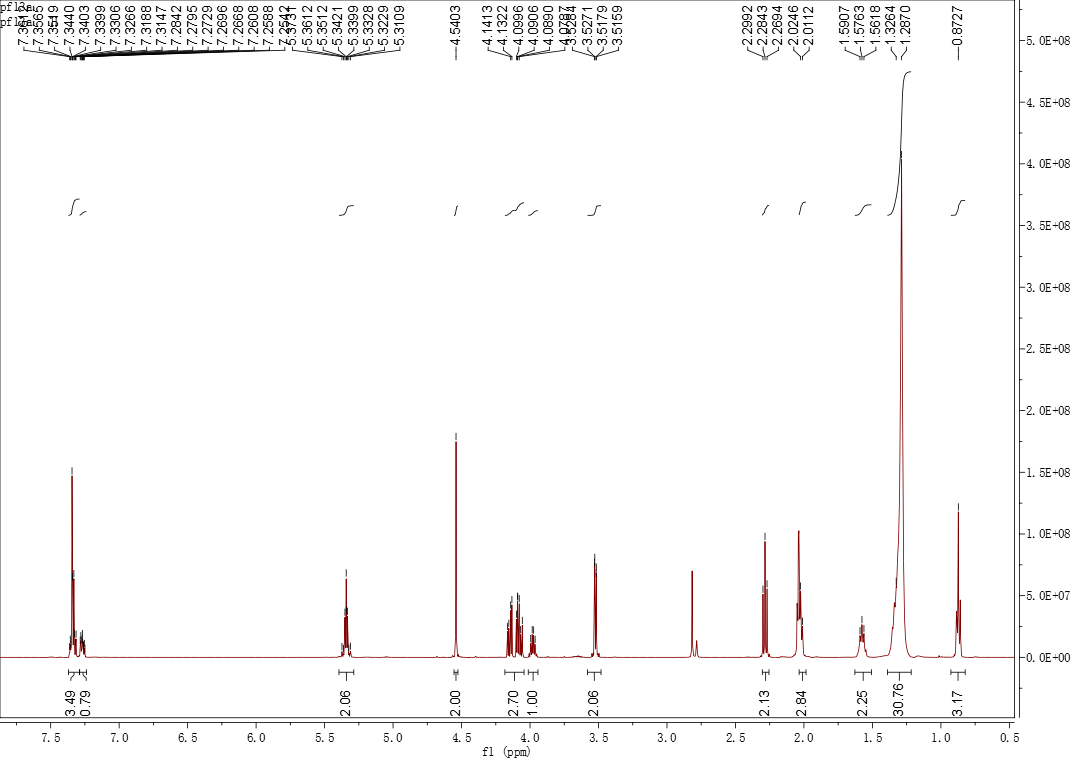


The 13C NMR spectrum of (*R*)-1-(benzyloxy)-3-hydroxypropan-2-yl (*Z*)-docos-13-enoate (acetone-d6, 125 MHz) (**7**)


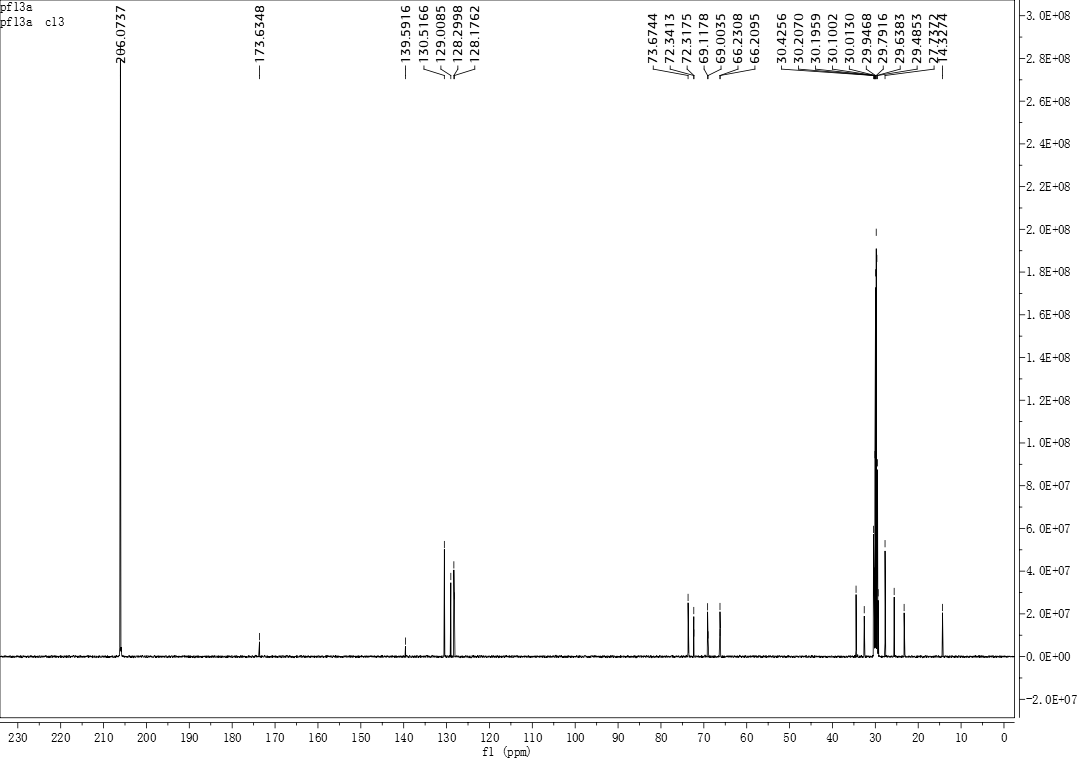


The IR spectrum of (*R*)-1-(benzyloxy)-3-hydroxypropan-2-yl (*Z*)-docos-13-enoate (KBr) (**7**)

###
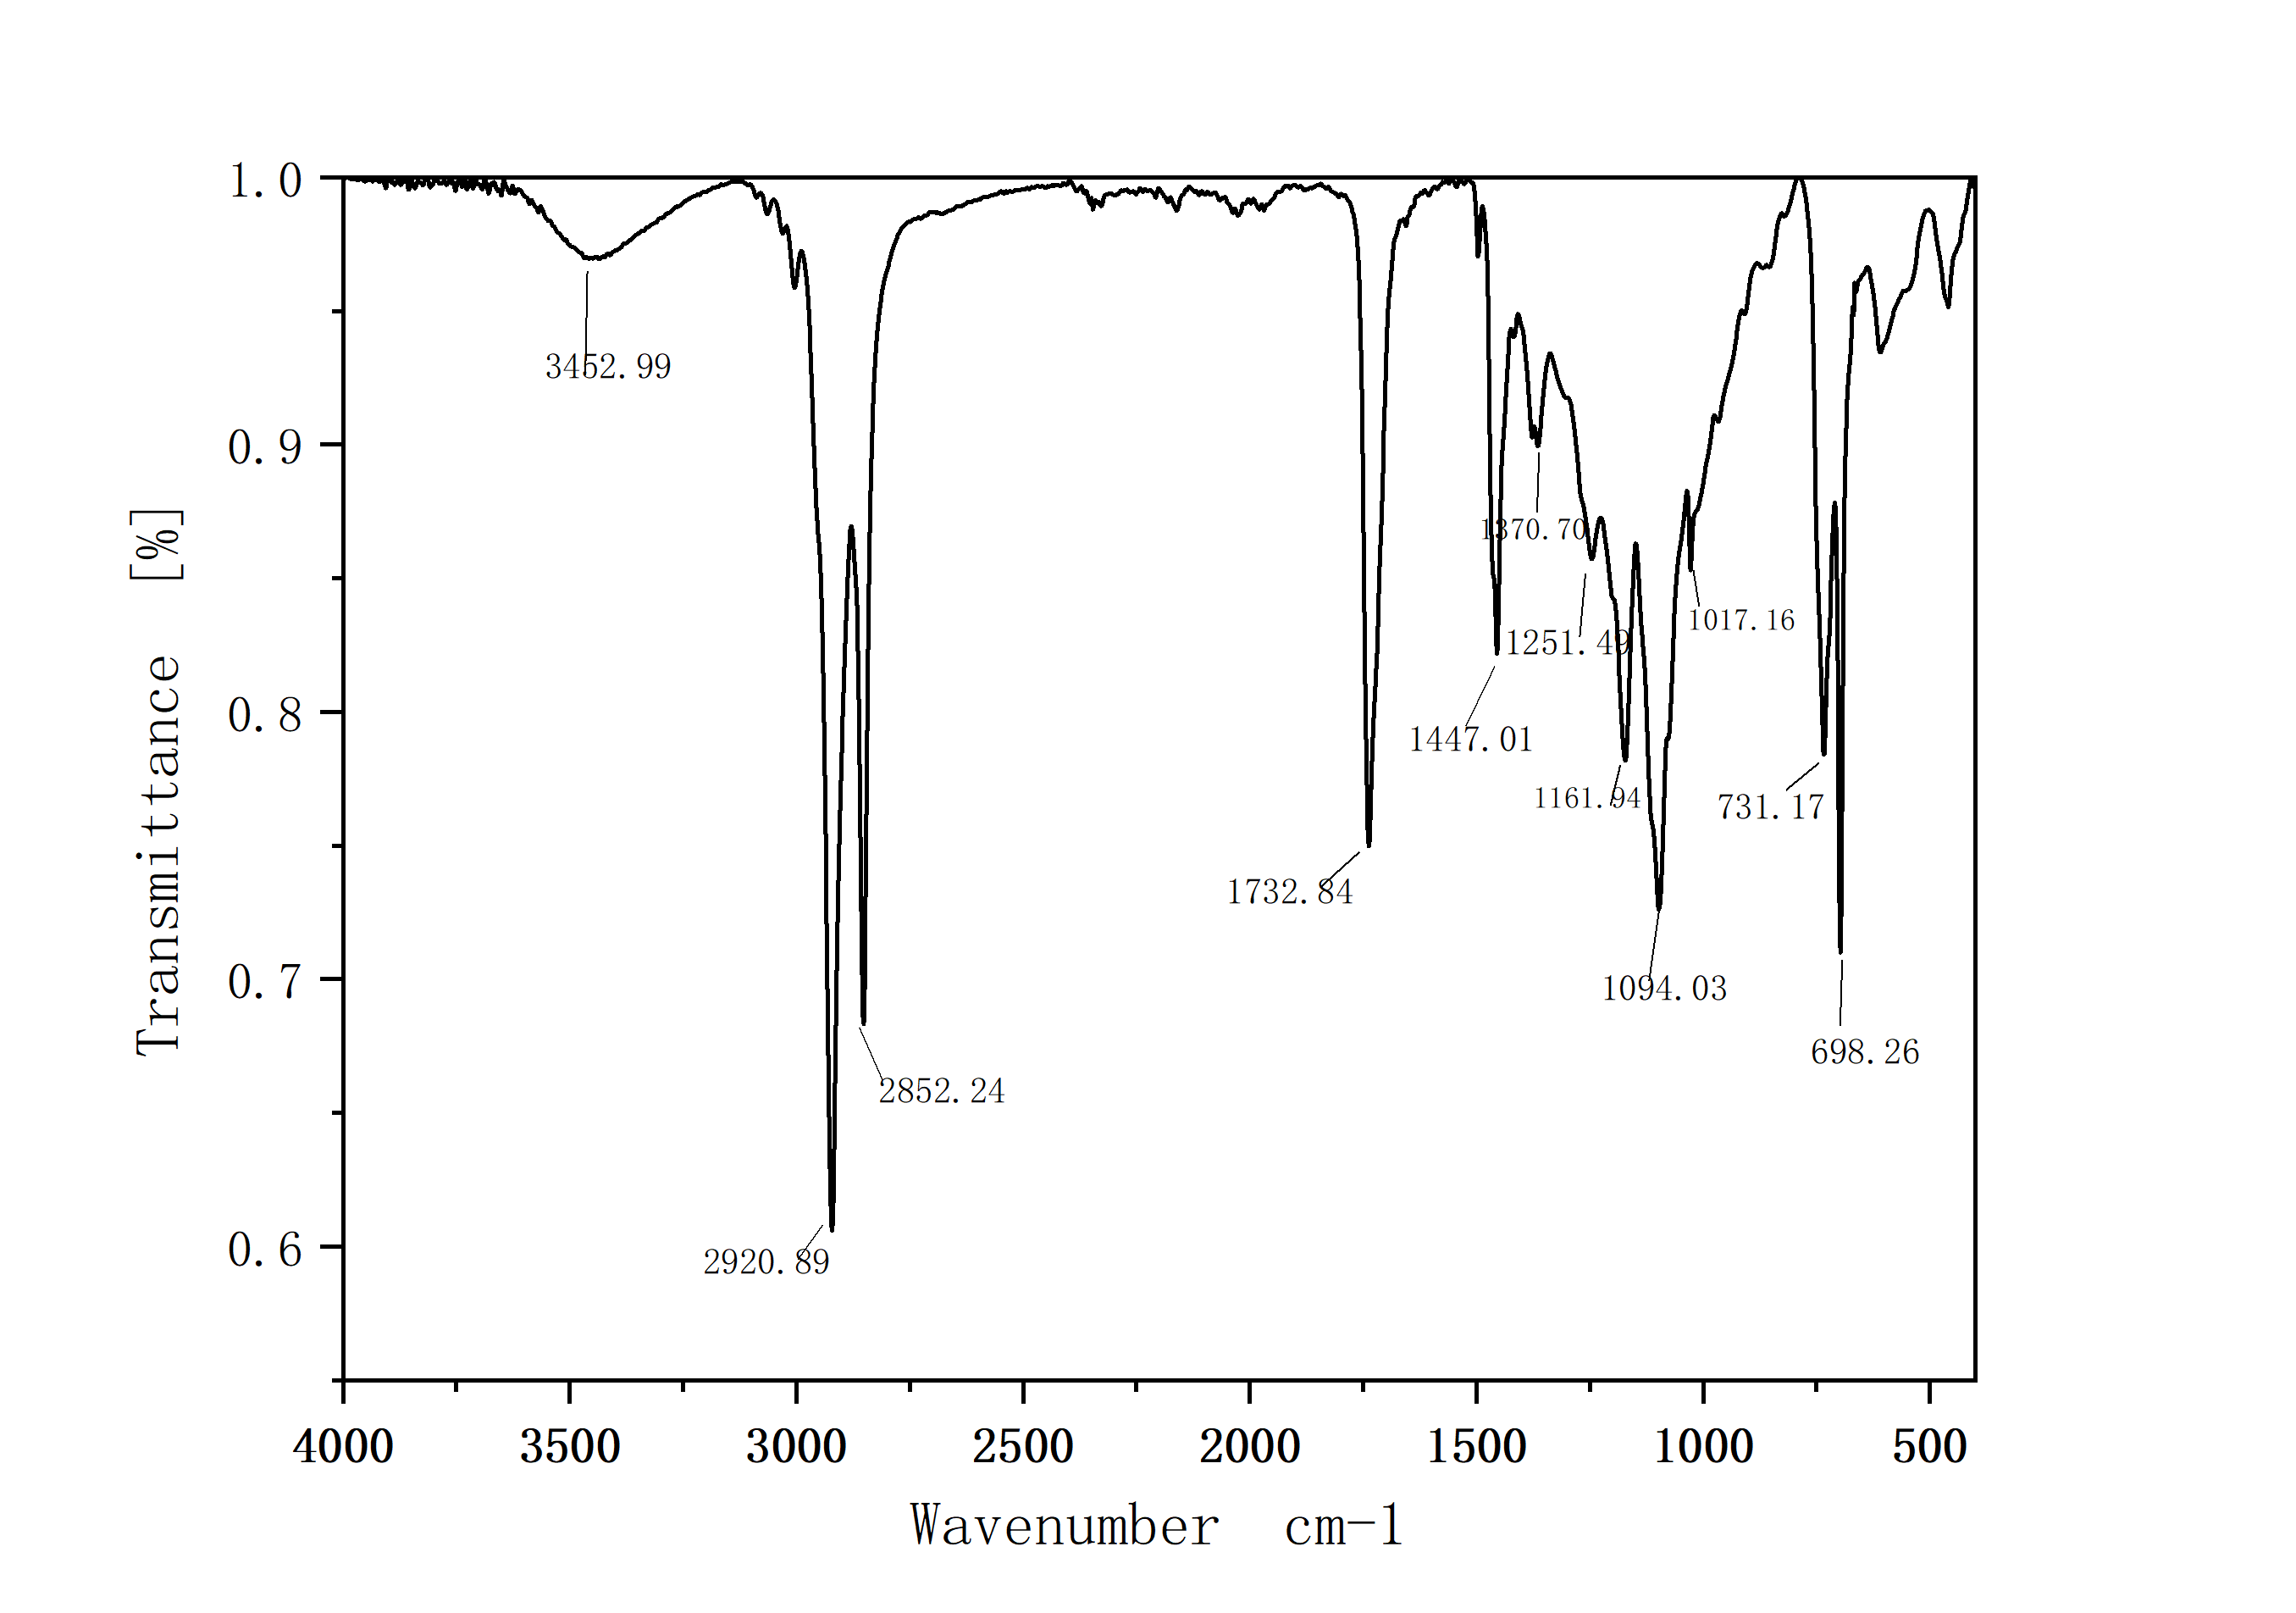


6. The 1H NMR spectrum of (*S*)-1-(benzyloxy)-3-(pentadecanoyloxy)propan-2-yl(*Z*)-docos-13 -enoate (acetone-d6, 500 MHz) (**8**)


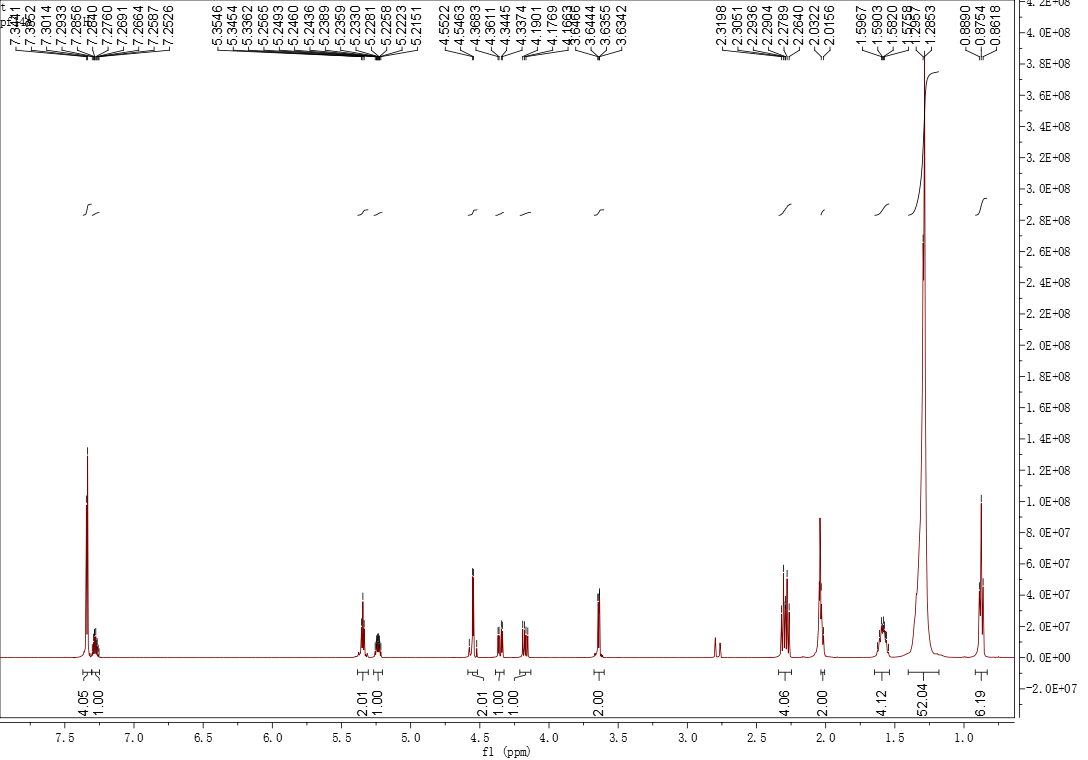


The 13C NMR spectrum of (*S*)-1-(benzyloxy)-3-(pentadecanoyloxy)propan-2-yl (*Z*)-docos-13- enoate (acetone-d6, 125 MHz) (**8**)


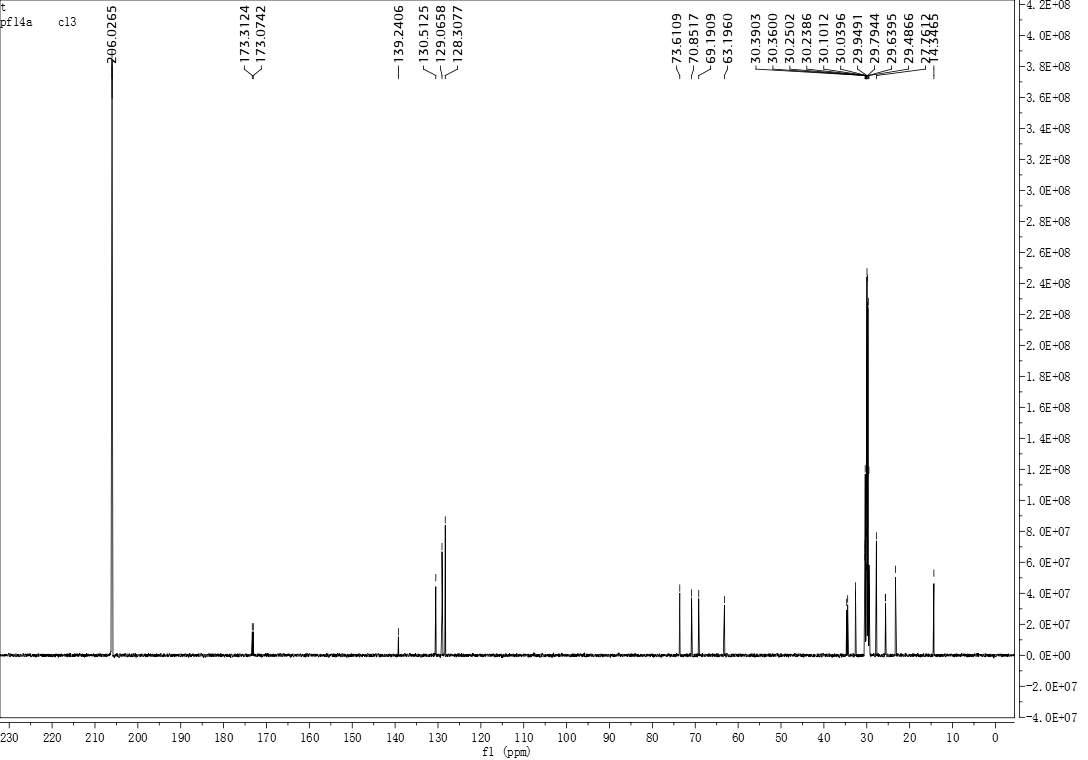


The IR spectrum of (*S*)-1-(benzyloxy)-3-(pentadecanoyloxy)propan-2-yl (*Z*)-docos-13-enoate (KBr) (**8**)

###
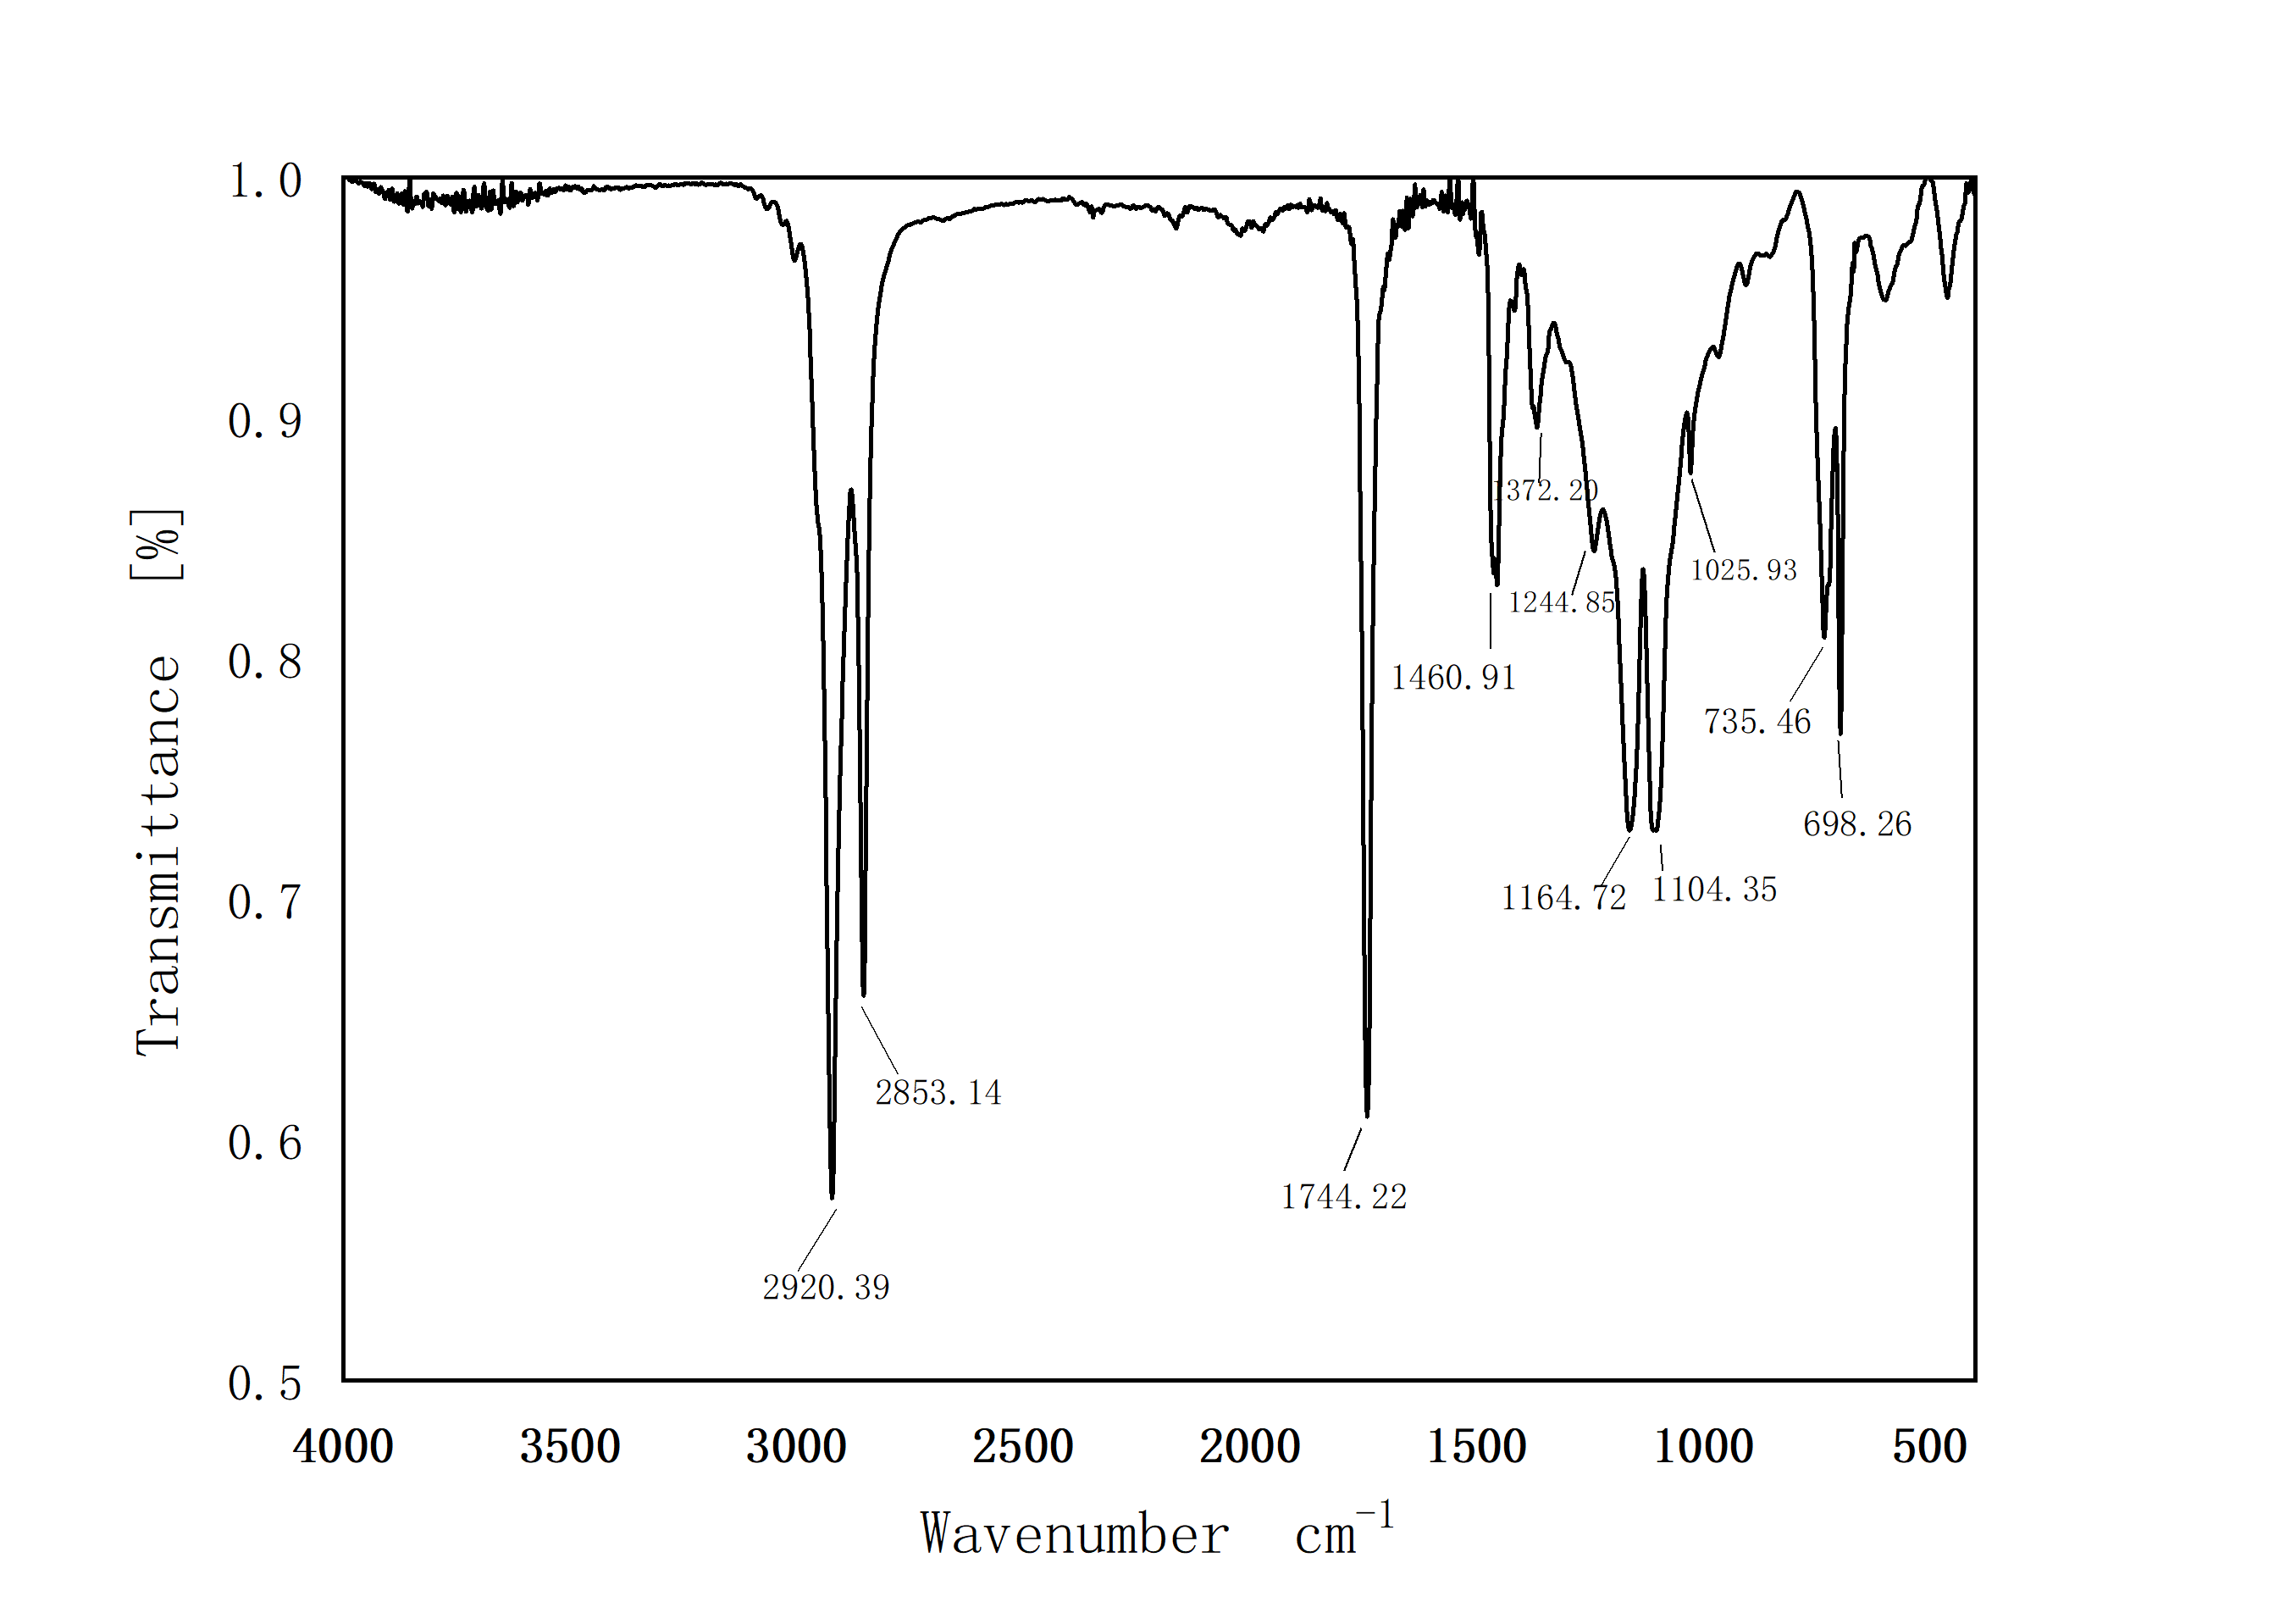


### 7. The 1H NMR spectrum of (*S*)-1-hydroxy-3-(pentadecanoyloxy)propan-2-yl (*Z*)-docos-13-enoate (acetone-d6, 500 MHz) (**1**)


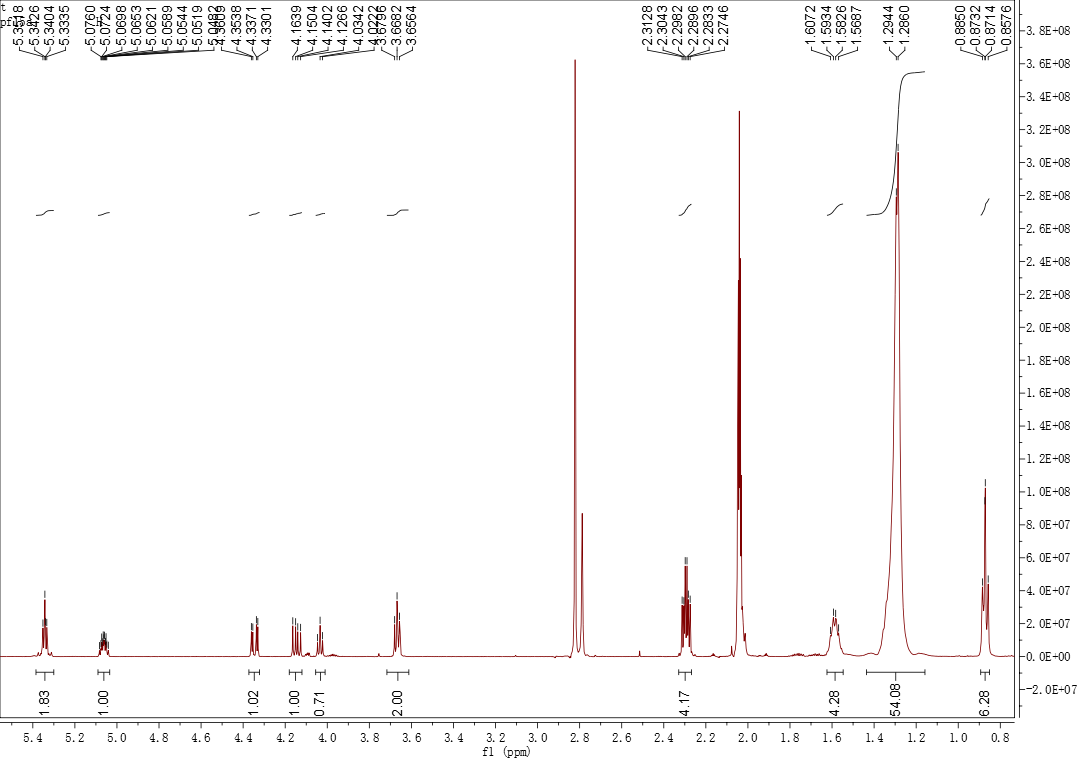


The 13C NMR spectrum of (*S*)-1-hydroxy-3-(pentadecanoyloxy)propan-2-yl (*Z*)-docos-13-enoate (acetone-d6, 125 MHz) (**1**)


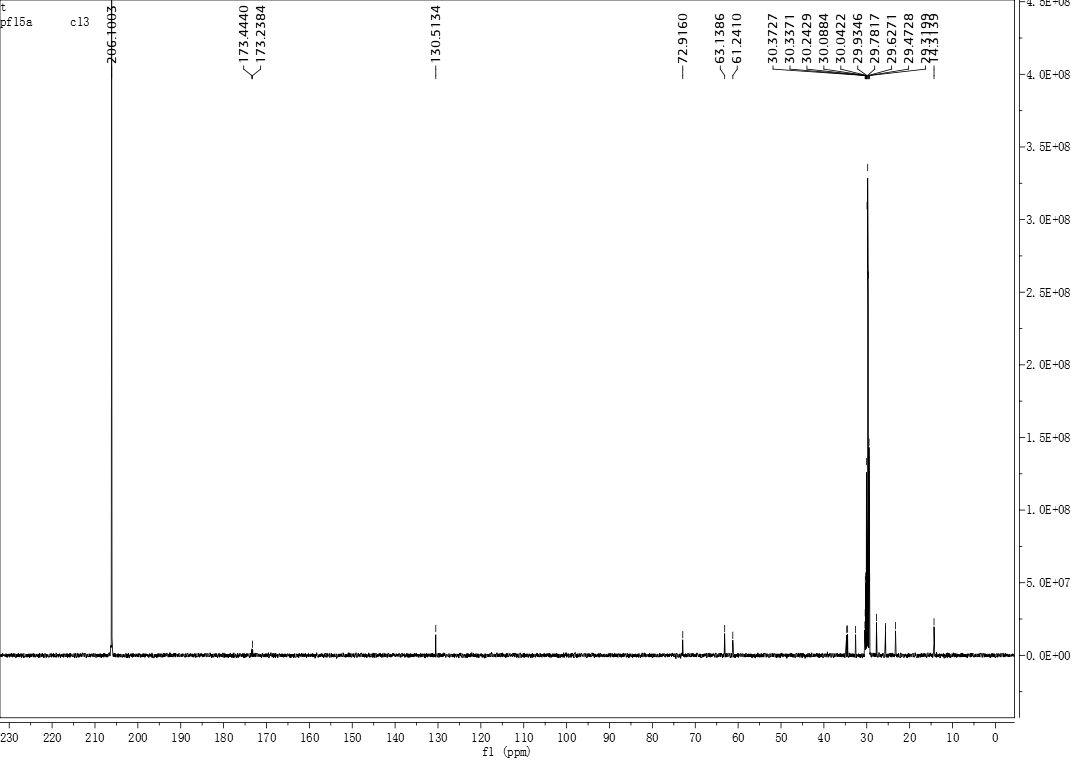


The IR spectrum of (*S*)-1-hydroxy-3-(pentadecanoyloxy)propan-2-yl (*Z*)-docos-13-enoate (KBr) (**1**)


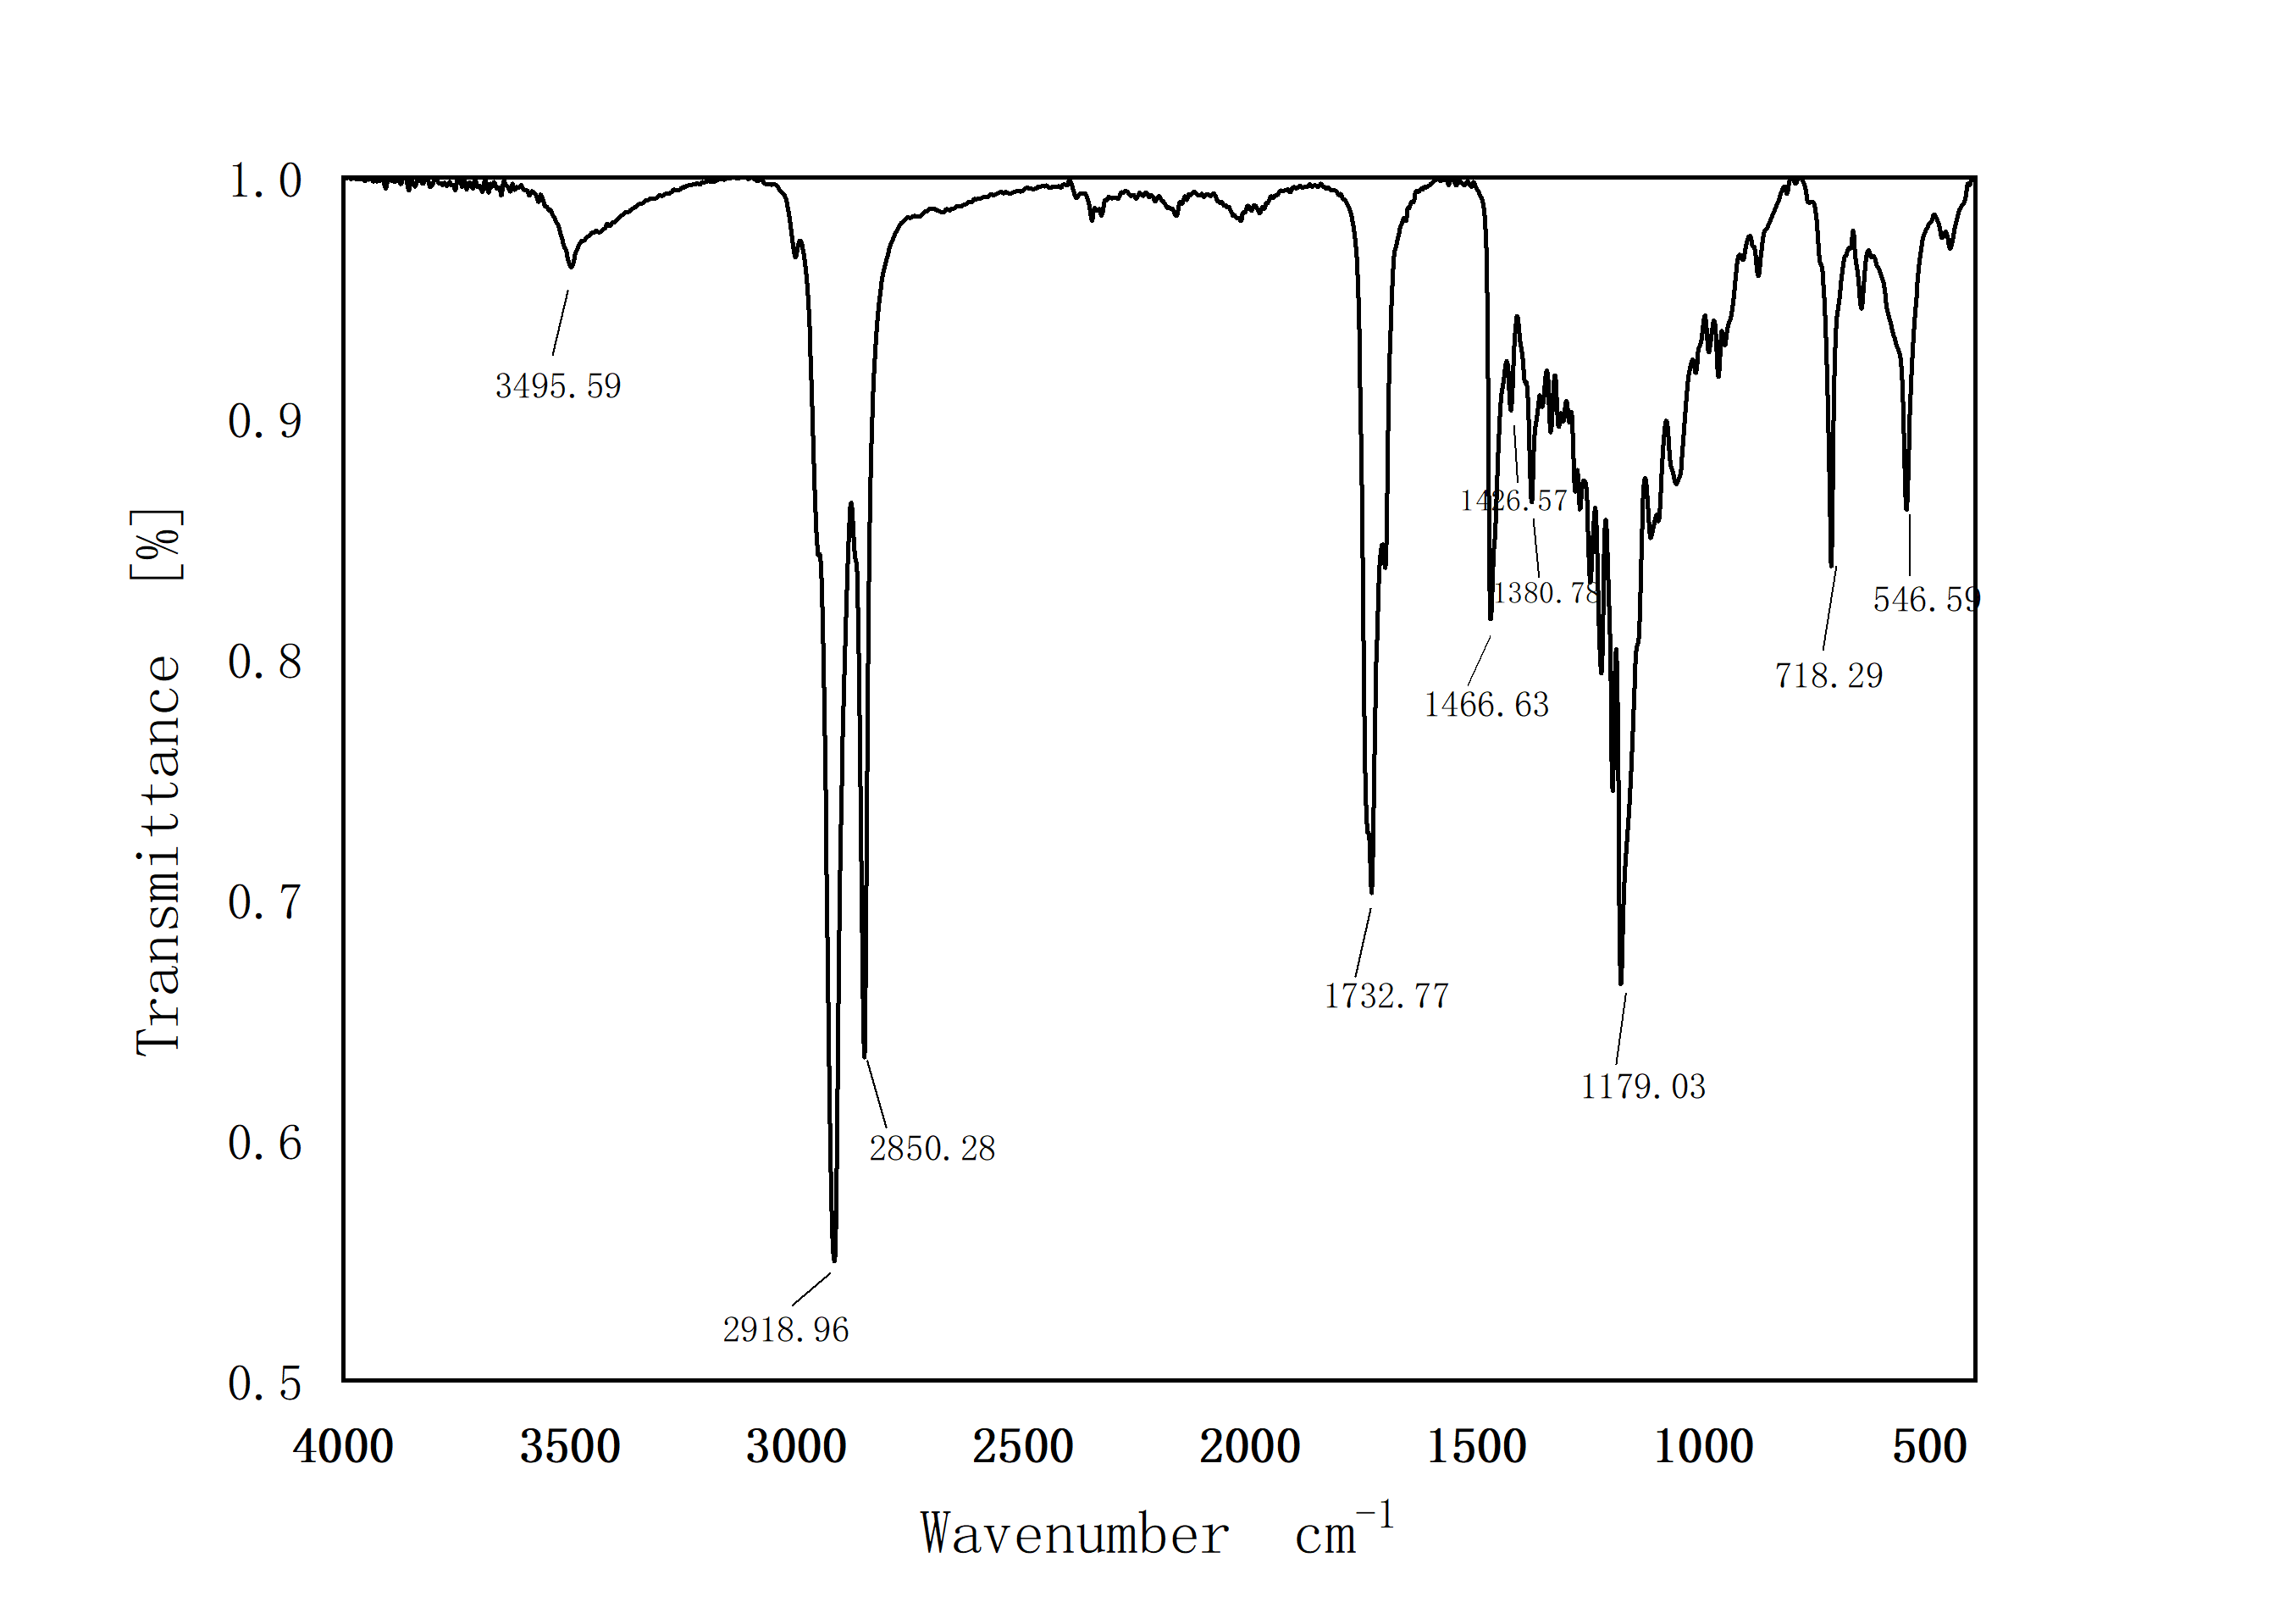


The high resolution mass spectrum of (*S*)-1-hydroxy-3-(pentadecanoyloxy)propan-2-yl(*Z*)-docos- 13-enoate (**1**)

###
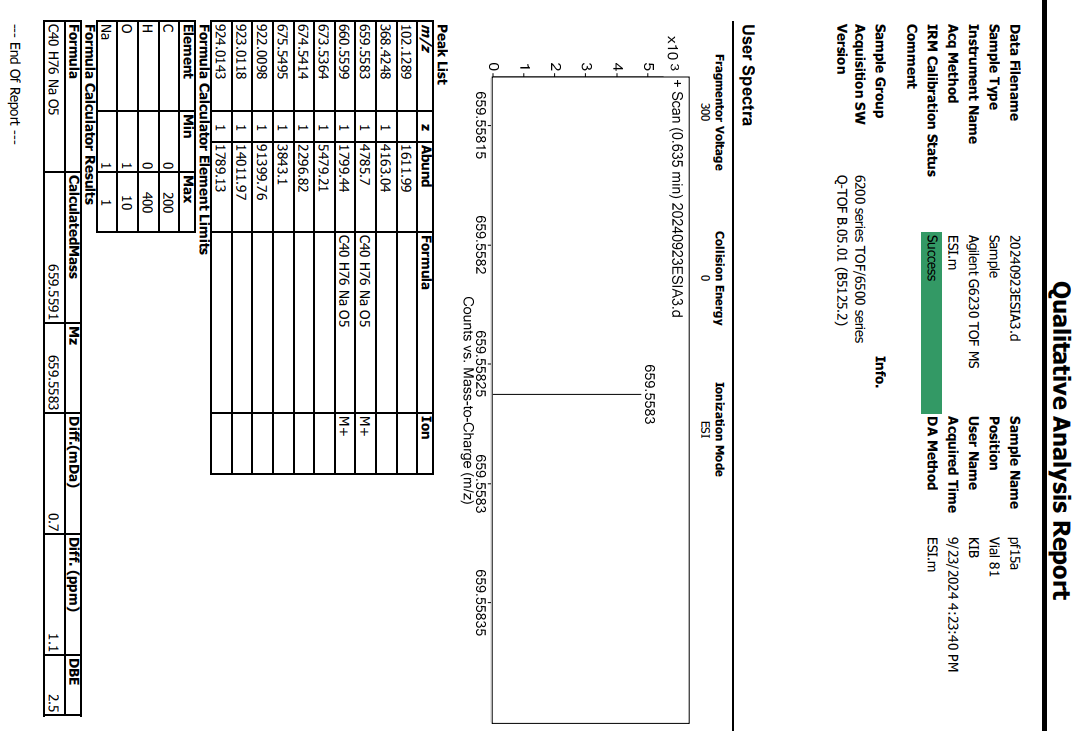

Supplement: Supplementary file 1 [file 0af617a2d549bf9097feaefc.docx]
